# Supplementary material for: Oral administration of Blautia wexlerae ameliorates obesity and type 2 diabetes via metabolic remodeling of the gut microbiota
Source: PubMed Central journal article supplement (PMC9388534; doi:10.1038/s41467-022-32015-7), 2022-08-18
Supplement: 41467_2022_32015_MOESM1_ESM.pdf [file 41467_2022_32015_MOESM1_ESM.pdf]

**Supplementary Information: Oral administration of *Blautia wexlerae* ameliorates obesity and type 2 diabetes via metabolic remodeling of the gut microbiota**  
**J. Kunisawa et al.**

# Supplementary Figure 1

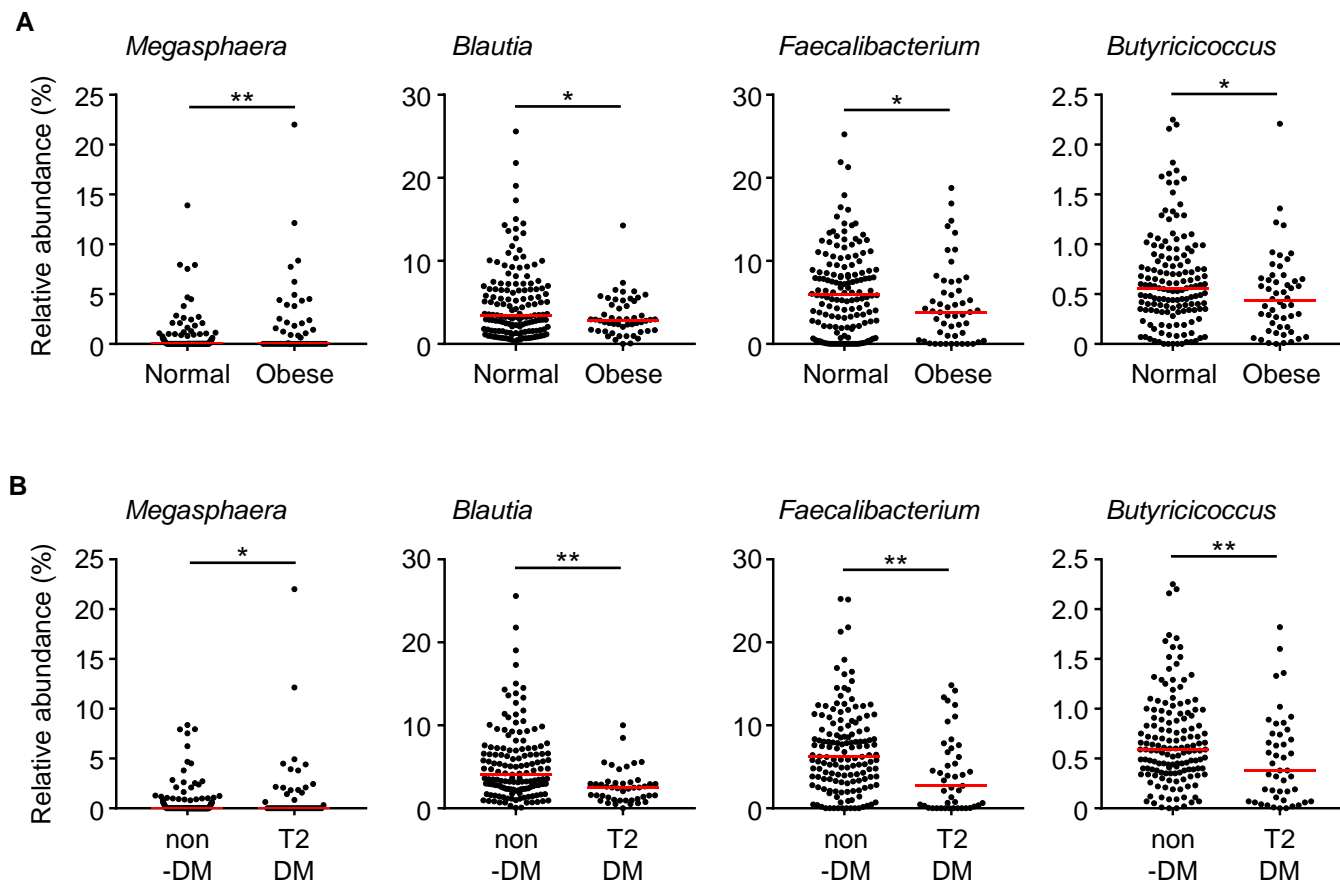

## Supplementary Figure 1. Relative abundance of human intestinal bacteria

(A) Comparison of relative abundance of human intestinal bacteria between normal-weight (BMI 18.5–24.9,  $n = 148$ ) and obese (BMI  $\geq 25$ ,  $n = 52$ ) Japanese adult participants. (B) Comparison of relative abundance of human intestinal bacteria between non-diabetic subjects (non-DM,  $n = 147$ ) and those with type 2 diabetes (T2DM,  $n = 45$ ). Statistical significance was evaluated by using the two-tailed Mann–Whitney  $U$ -test;  $*P < 0.05$ ;  $**P < 0.01$ . Red lines indicate mean.

## Supplementary Figure 2

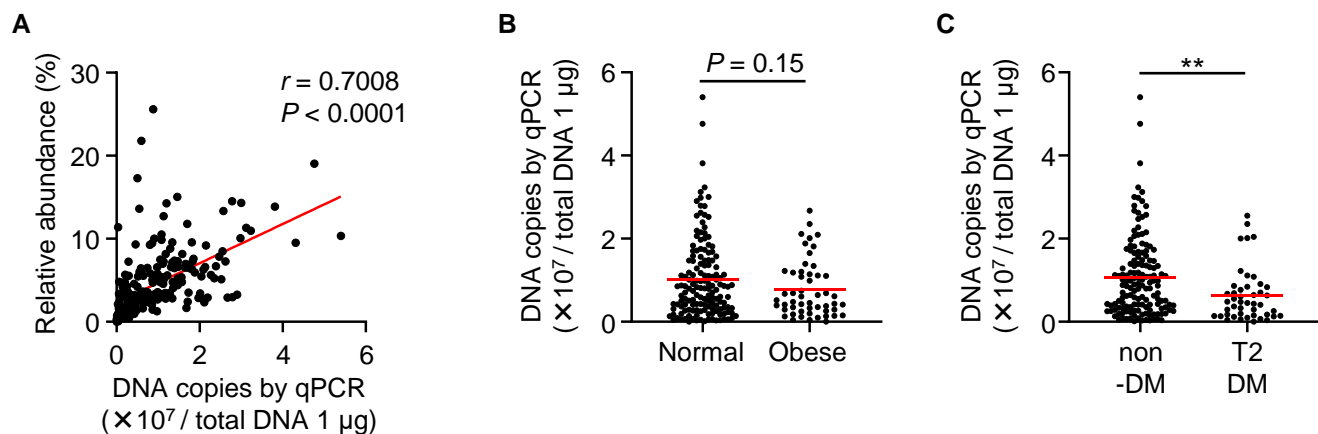

### Supplementary Figure 2. Validation of *Blautia* abundance by quantitative PCR analysis

(A) Spearman correlation analysis between the relative abundance of the *Blautia* genus according to 16S rRNA gene amplicon sequencing analysis and the DNA copy number of the *Blautia* genus as measured through quantitative PCR analysis. (B) Comparison of the *Blautia* DNA copy number of human intestinal bacteria between normal-weight (BMI 18.5–24.9, n = 148) and obese (BMI  $\geq 25$ , n = 52) Japanese adult participants. (C) Comparison of the *Blautia* DNA copy number of human intestinal bacteria between non-diabetic subjects (non-DM, n = 147) and those with type 2 diabetes (T2DM, n = 45). Statistical significance was evaluated by using the two-tailed Mann–Whitney *U*-test;  $**P = 0.0014$ . Red lines indicate single linear regression (A) or mean (B, C).

## Supplementary Figure 3

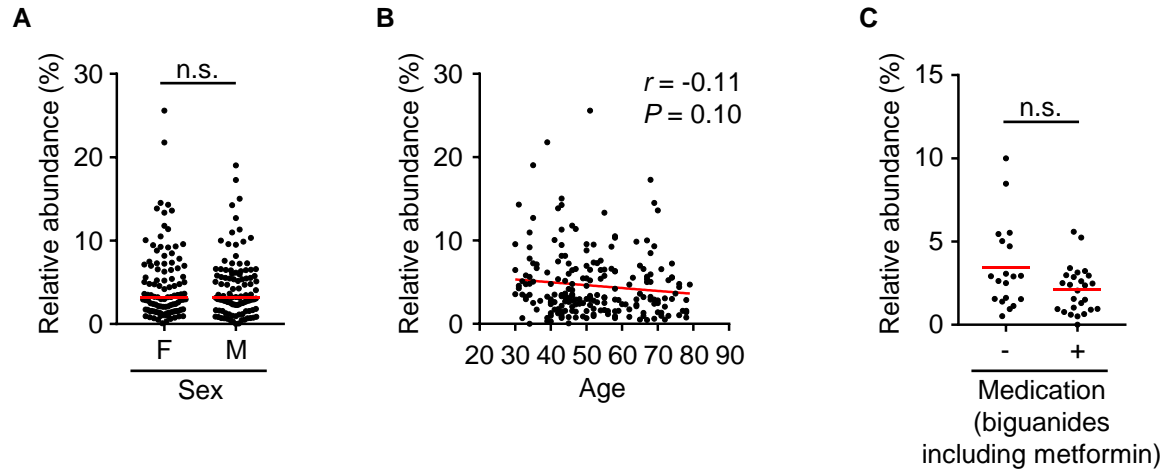

### Supplementary Figure 3. Effects of potential confounding factors of sex, age, and medication

(A) Comparison of the abundance of the *Blautia* genus according to sex (F, female, n = 107; M, male, n = 110).

(B) Pearson correlation analysis between *Blautia* genus abundance and age. (C) Comparison of *Blautia* genus

abundance between T2DM patients non-treated (-) or treated (+) with biguanides, such as metformin. Statistical significance was evaluated by using the two-tailed Mann-Whitney *U*-test; n.s., not significant (A, C). Red lines indicate mean (A, C) or single linear regression (B).

## Supplementary Figure 4

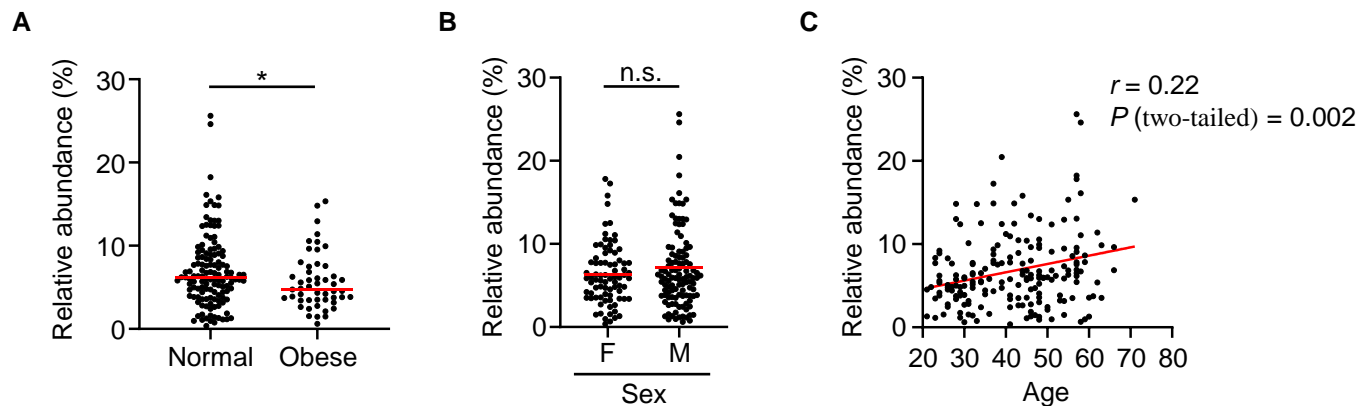

### Supplementary Figure 4. Relative abundance of *Blautia* genus in validation cohort

(A) Comparison of relative abundance of *Blautia* genus between normal-weight (BMI 18.5–24.9, n = 132) and obese (BMI ≥ 25, n = 50) Japanese adult participants. (B) Comparison of the abundance of the *Blautia* genus according to sex (F, female, n = 81; M, male, n = 114). (C) Pearson correlation analysis between *Blautia* genus abundance and age (n = 195). Statistical significance was evaluated by using the two-tailed Mann–Whitney *U*-test; \* $P = 0.0435$ ; n.s., not significant (A, B). Red lines indicate mean (A, B) or single linear regression (C).

## Supplementary Figure 5

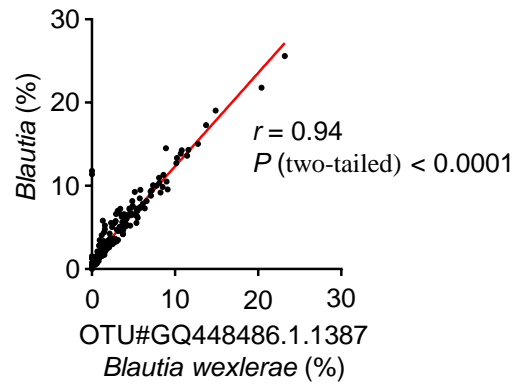

**Supplementary Figure 5. Positive correlation (Pearson correlation analysis) between the abundance of *Blautia* genus and *B. wexlerae* (OTU GQ448486.1.1387)**

Red line indicates single linear regression.

# Supplementary Figure 6

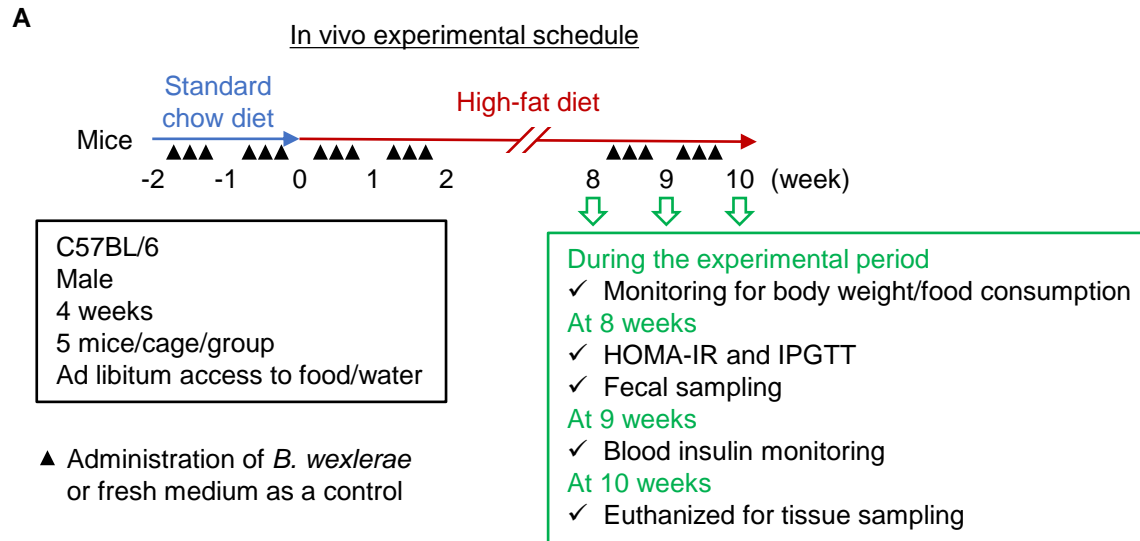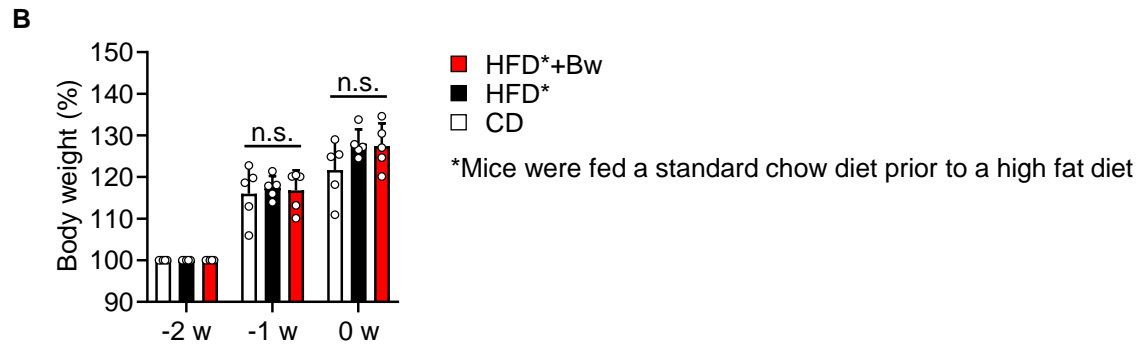

## Supplementary Figure 6. Schedule for mouse experiment

(A) The schedule for investigating the effects of oral administration of *B. wexlerae* on high-fat diet (HFD)-induced obesity and diabetes in mice. (B) Mice were weighed weekly ( $n = 5$ , mean  $\pm 1$  SD) prior to feeding a high-fat diet. Statistical significance was evaluated by using one-way ANOVA; n.s., not significant. CD, CD-fed mice; HFD, HFD-fed mice; HFD+Bw, HFD-fed mice orally supplemented with *B. wexlerae*. Data are representative of 2 independent experiments.

# Supplementary Figure 7

**A** Composition of diet (ingredients, g %)

|                             | Standard chow diet | High fat diet |
|-----------------------------|--------------------|---------------|
| Casein                      | 14.0               | 25.0          |
| L-Cystine                   | 0.18               | 0.375         |
| Corn Starch                 | 46.5692            | -             |
| Pregelatinized Corn Starch  | 15.5               | 14.869        |
| Sucrose                     | 10.0               | 20.0          |
| Soybean Oil                 | 4.0                | 10.0          |
| Beef tallow                 | -                  | 5.0           |
| Lard                        | -                  | 15.0          |
| Cellulose Powder            | 5.0                | 5.0           |
| AIN-93 Mineral Mix          | 3.5                | 3.5           |
| AIN-93 Vitamin Mix          | 1.0                | 1.0           |
| Choline bitartrate          | 0.25               | 0.25          |
| <i>t</i> -Butylhydroquinone | 0.0008             | 0.006         |
| Total                       | 100.0              | 100.0         |
| kcal/100 g                  | 353.5              | 475.2         |

**B**

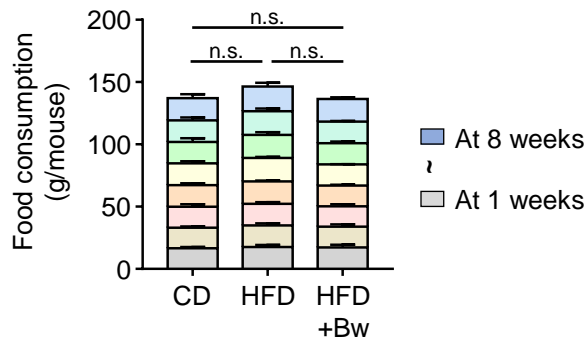

**C**

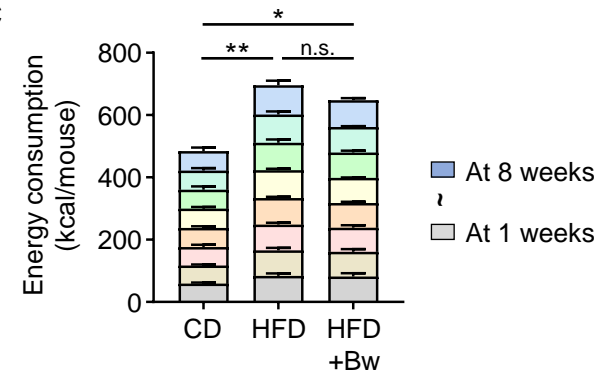

## Supplementary Figure 7. Food intake of mice

(A) Composition of diet. (B) The amount of chow consumed (g) by each cage of 5 mice was measured each week in 3 independent experiments, and the average intake per mouse is shown (n = 3, mean  $\pm$  1 SD). (C) The calculated amount of energy consumed (kcal) (n = 3, mean  $\pm$  1 SD). Statistical significance was evaluated by using one-way ANOVA; \* $P$  = 0.0206; \*\* $P$  = 0.0063; n.s., not significant. CD, CD-fed mice; HFD, HFD-fed mice; HFD+Bw, HFD-fed mice orally supplemented with *B. wexlerae*.



## Supplementary Figure 8

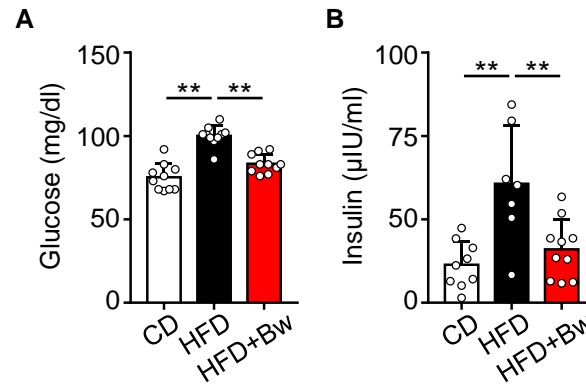

### Supplementary Figure 8. Blood diabetes indicators in mice

(A) Fasting blood glucose. Data are combined from 2 independent experiments ( $n = 10$ , mean  $\pm$  1 SD). (B) Fasting blood insulin. Data are combined from 2 independent experiments without hemolytic samples ( $n = 7-10$ , mean  $\pm$  1 SD). Statistical significance was evaluated by using one-way ANOVA;  $**P < 0.01$ . CD, CD-fed mice; HFD, HFD-fed mice; HFD+Bw, HFD-fed mice orally supplemented with *B. wexlerae*.

## Supplementary Figure 9

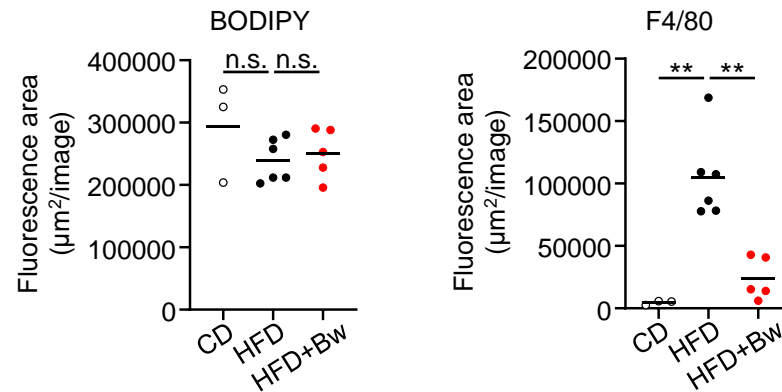

**Figure S9. Fluorescence area for BODIPY and F4/80 in eAT sections**

CD, CD-fed mice; HFD, HFD-fed mice; HFD+Bw, HFD-fed mice orally supplemented with *B. wexlerae*. Statistical significance was evaluated by using one-way ANOVA; \*\* $P < 0.01$ ; n.s., not significant. Data are combined from 2 independent experiments ( $n = 3-6$ , mean  $\pm$  1 SD).

# Supplementary Figure 10

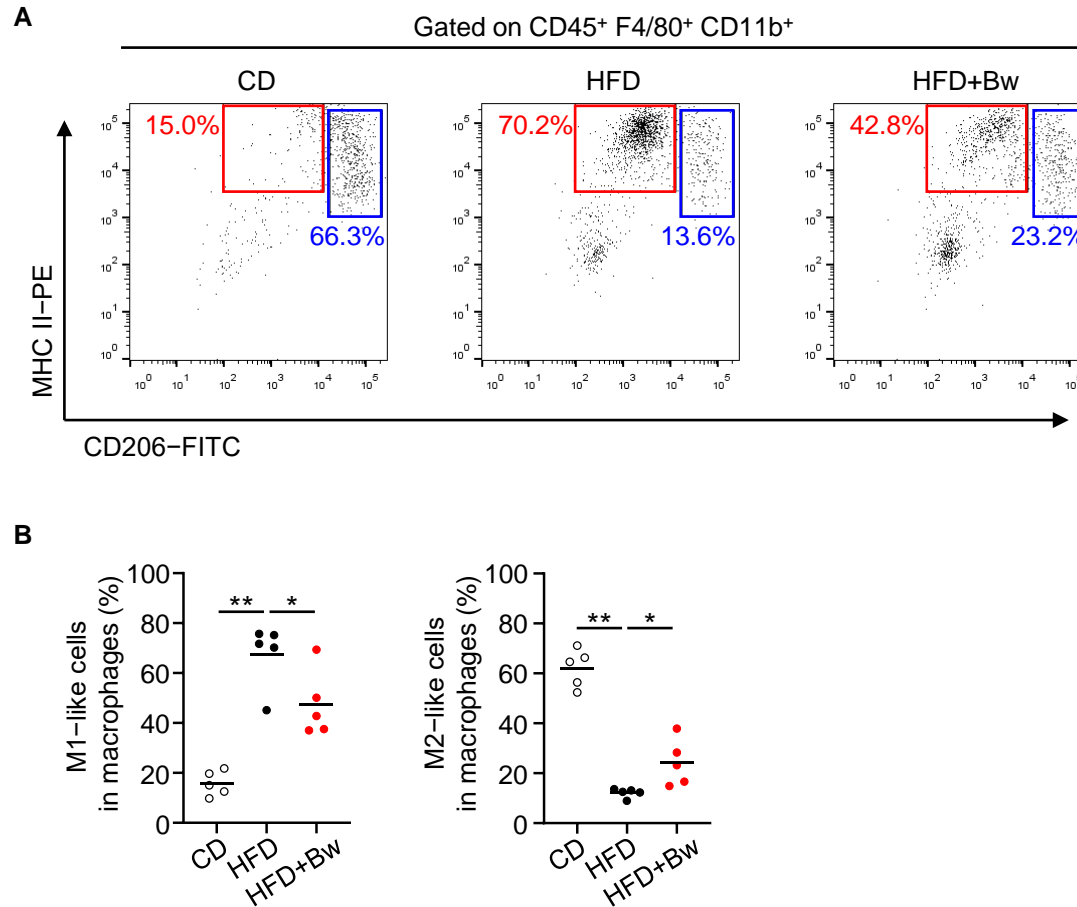

## Supplementary Figure 10. Flow cytometric analysis of M1- and M2-like macrophages in eAT

(A) Representative flow cytometry plot. (B) The percentage of M1/M2-like macrophages. The CD45<sup>+</sup>CD11b<sup>+</sup>F4/80<sup>+</sup> cells were defined as the macrophage population. Among macrophages, the MHC II<sup>+/high</sup>CD206<sup>-/low</sup> cells and MHC II<sup>+</sup>CD206<sup>high</sup> cells were defined as the M1- and M2-like macrophage population, respectively. CD, CD-fed mice; HFD, HFD-fed mice; HFD+Bw, HFD-fed mice orally supplemented with *B. wexlerae*. Statistical significance was evaluated by using one-way ANOVA; \* $P < 0.05$ ; \*\* $P < 0.01$ ; n.s., not significant. Data are representative of 2 independent experiments (n = 5, mean).

# Supplementary Figure 11

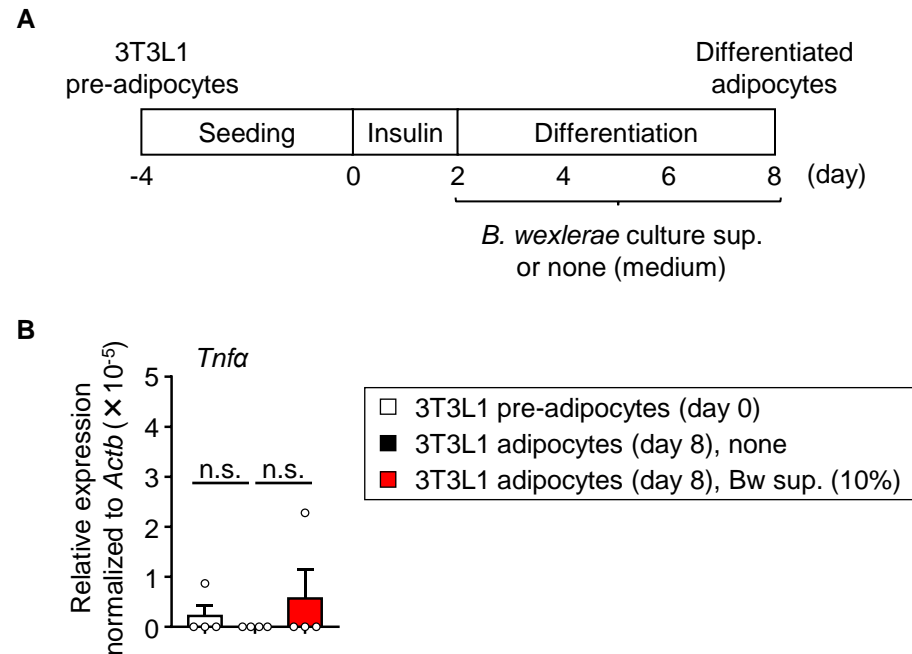

## Supplementary Figure 11. Culture of 3T3L1 adipocytes

(A) The procedure for differentiating 3T3L1 pre-adipocytes into mature adipocytes. (B) Gene expression of *Tnfa*, an inflammatory cytokine, in 3T3L1 pre-adipocytes and 3T3L1 adipocytes treated without (none) or with the supernatant (sup.) from *B. wexlerae* cultures at a final concentration of 10%. Statistical significance was evaluated by using one-way ANOVA; n.s., not significant. Data are representative of 2 independent experiments (n = 4, mean  $\pm$  1 SD).

## Supplementary Figure 12

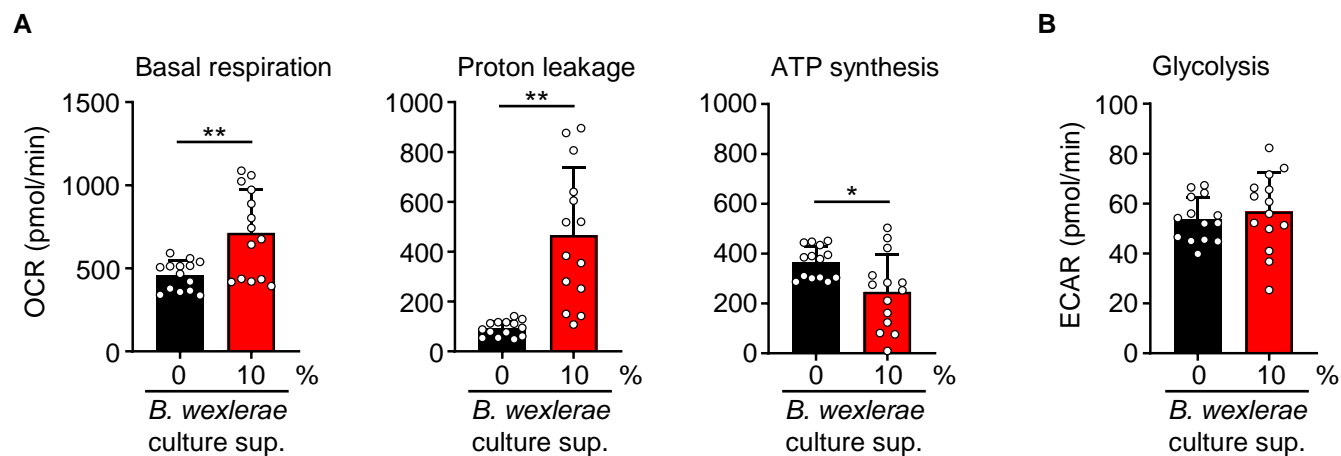

### Supplementary Figure 12. Measurement of oxygen consumption rate and extracellular acidification rate in 3T3L1 adipocytes

(A) Oxygen consumption rate (OCR) and (B) extracellular acidification rate (ECAR) were measured in 3T3L1 adipocytes treated without or with the supernatant from *B. wexlerae* cultures at a final concentration of 10% by using an XF24 extracellular flux analyzer. OCR for basal respiration, proton leakage, and ATP synthesis were measured by using an XF Mito Stress Kit. Statistical significance was evaluated by using one-way ANOVA; \* $P < 0.05$ ; \*\* $P < 0.01$ . Data are combined from 2 independent experiments ( $n = 14$ , mean  $\pm$  1 SD).

# Supplementary Figure 13

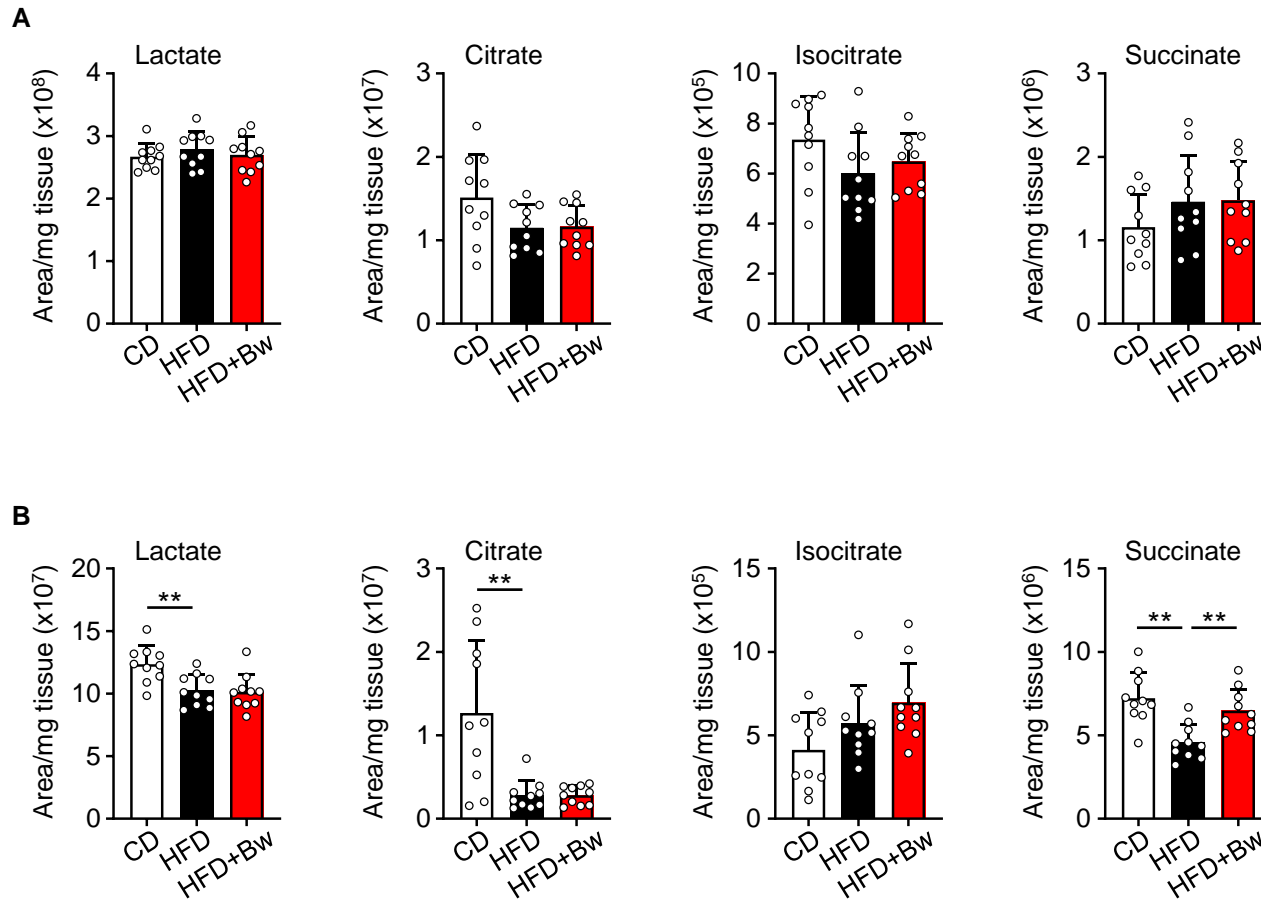

## Supplementary Figure 13. Energy metabolism in gastrocnemius muscle and liver of mice

Representative metabolites of glycolysis (lactate) and the TCA cycle (citrate, isocitrate, and succinate) in the gastrocnemius muscle (A) and liver (B) of mice were measured by using liquid chromatography-tandem mass spectroscopy (LC-MS/MS). Statistical significance was evaluated by using one-way ANOVA; \* $P < 0.05$ ; \*\* $P < 0.01$ ; n.s., not significant. CD, CD-fed mice; HFD, HFD-fed mice; HFD+Bw, HFD-fed mice orally supplemented with *B. wexlerae*. Data are combined from 2 independent experiments ( $n = 10$ , mean  $\pm$  1 SD).

## Supplementary Figure 14

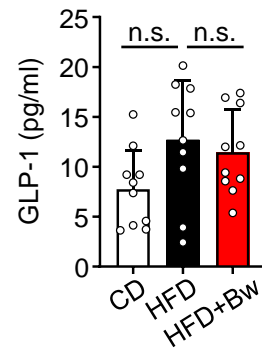

### Supplementary Figure 14. Serum GLP-1 in mice

Statistical significance was evaluated by using one-way ANOVA; n.s., not significant. CD, CD-fed mice; HFD, HFD-fed mice; HFD+Bw, HFD-fed mice orally supplemented with *B. wexlerae*. Data are combined from 2 independent experiments (n = 10, mean  $\pm$  1 SD).

# Supplementary Figure 15

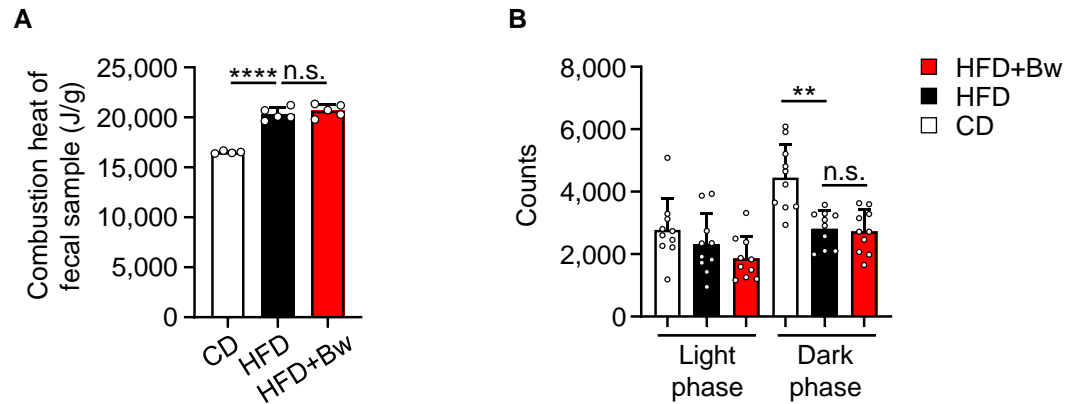

## Supplementary Figure 15. Energy excretion in mice

(A) Energy values for mouse feces. Data are representative of 2 independent experiments ( $n = 4-5$ , mean  $\pm$  1 SD). (B) Spontaneous activity of mice during 24 h. Data are combined from 2 independent experiments ( $n = 10$ , mean  $\pm$  1 SD). Statistical significance was evaluated by using one-way ANOVA; \*\*\*\* $P < 0.0001$ ; \*\* $P = 0.0010$ ; n.s., not significant. CD, CD-fed mice; HFD, HFD-fed mice; HFD+Bw, HFD-fed mice orally supplemented with *B. wexlerae*.



## Supplementary Figure 16

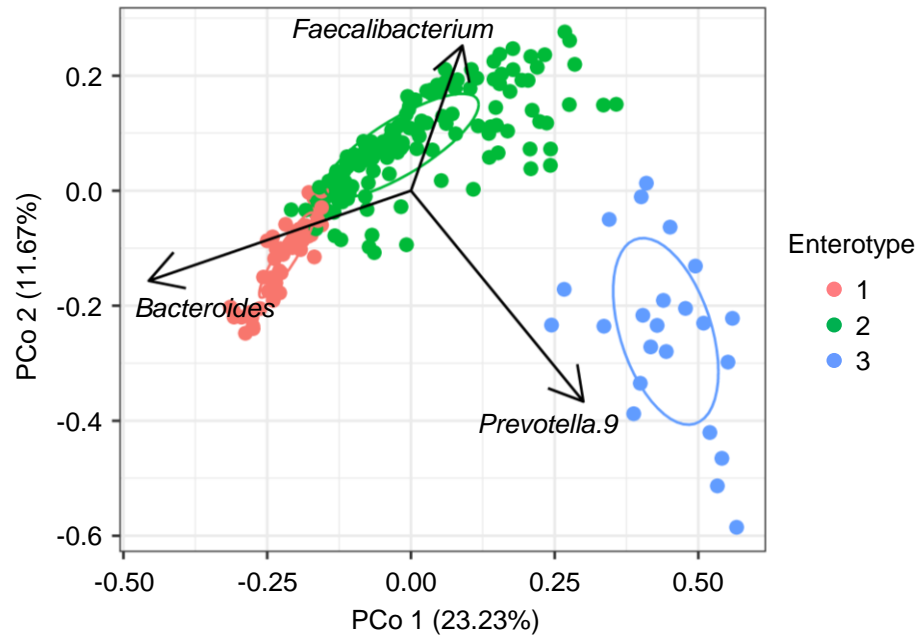

**Supplementary Figure 16. Distribution of human gut microbiome according to principal coordinates analysis (PCoA, genus-level Jensen-Shannon Divergence)**  
1, *Bacteroides* enterotype (red); 2, *Faecalibacterium* enterotype (green); 3, *Prevotella* enterotype (blue). Arrows, enterotype drivers.

# Supplementary Figure 17

## Comparison of *Blautia* and *Bacteroides*

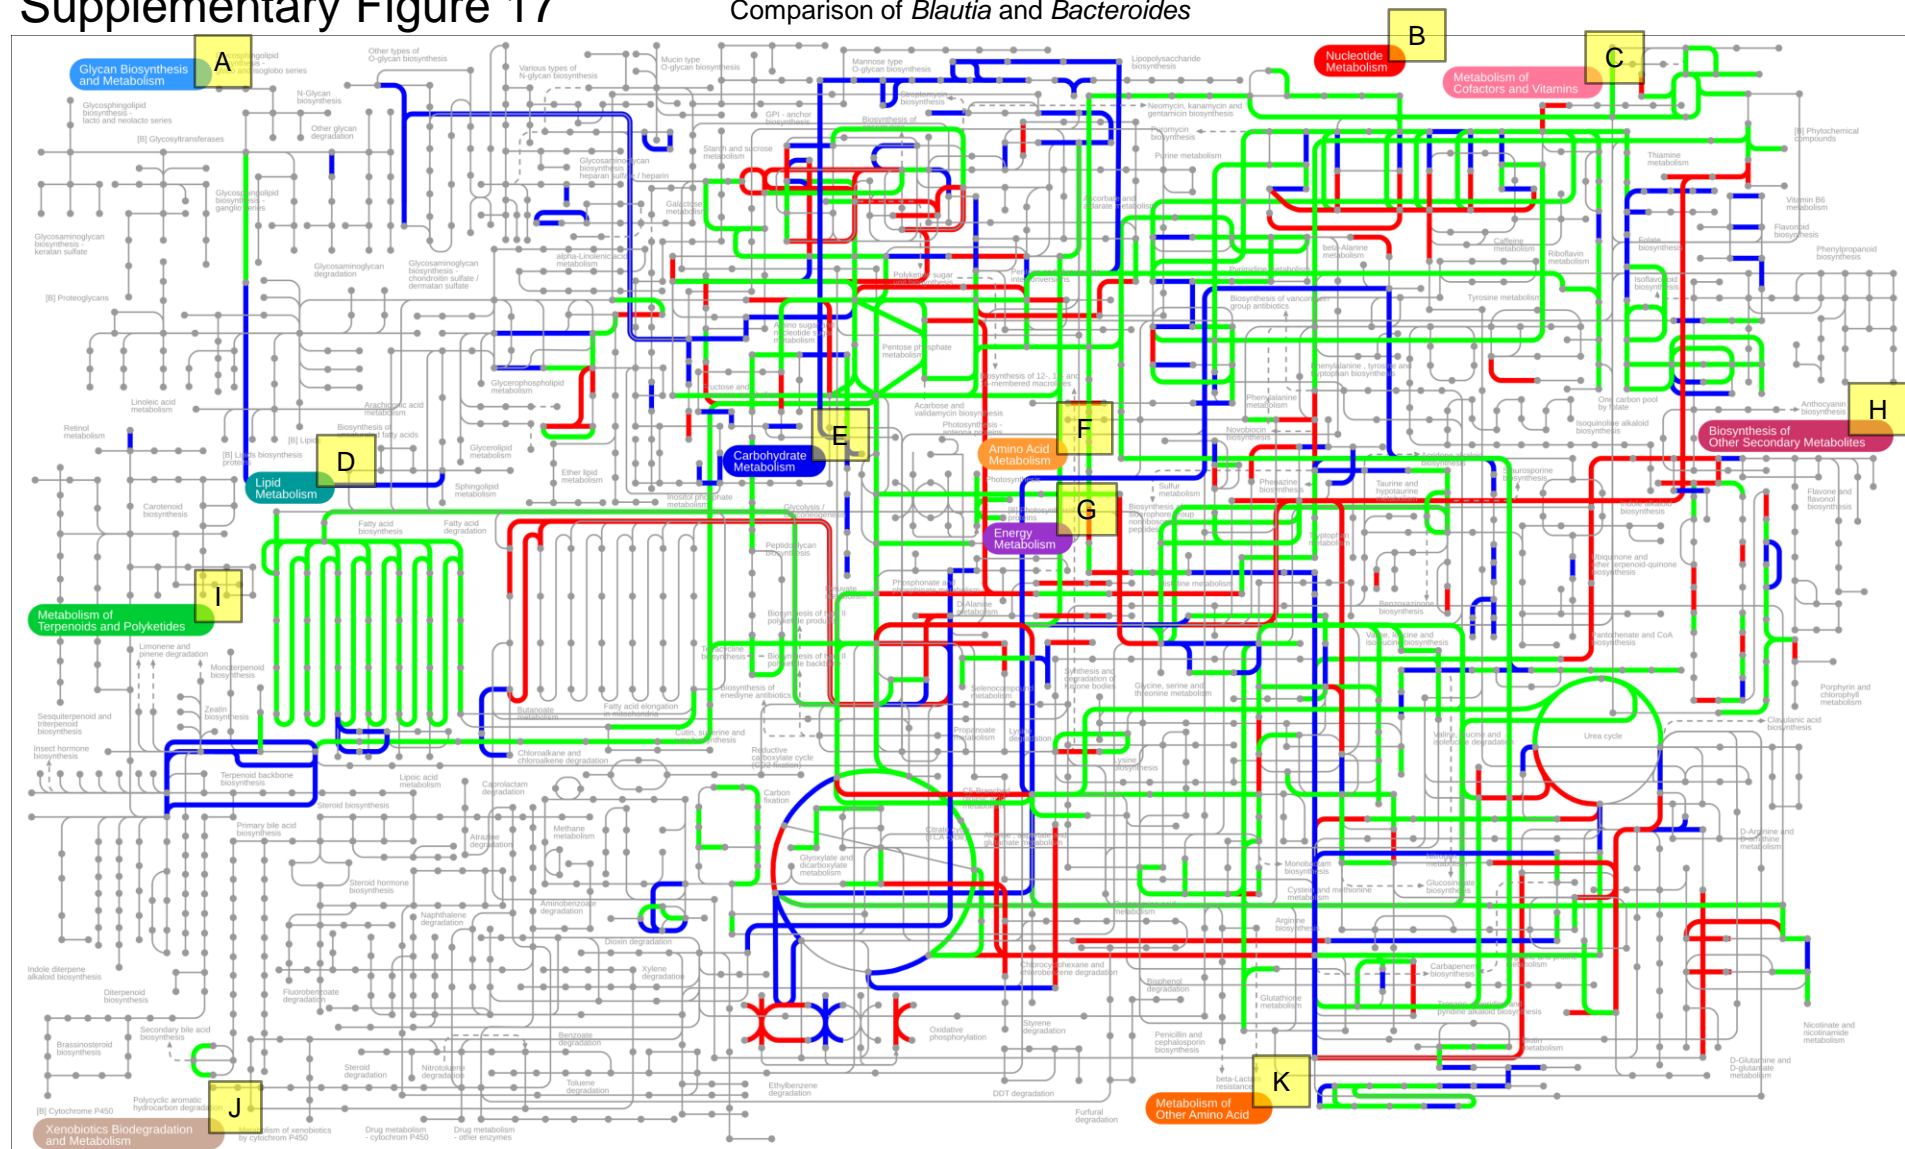

- |                                               |                                                      |                                                    |                                                                                                                                                         |
|-----------------------------------------------|------------------------------------------------------|----------------------------------------------------|---------------------------------------------------------------------------------------------------------------------------------------------------------|
| <b>A</b> Glycan Biosynthesis and Metabolism   | <b>E</b> Carbohydrate Metabolism                     | <b>I</b> Metabolism of Terpenoids and Polyketides  | <span style="color: red;">—</span> <i>Blautia</i> <span style="color: blue;">—</span> <i>Bacteroides</i> <span style="color: green;">—</span> In common |
| <b>B</b> Nucleotide Metabolism                | <b>F</b> Amino Acid Metabolism                       | <b>J</b> Xenobiotics Biodegradation and Metabolism |                                                                                                                                                         |
| <b>C</b> Metabolism of Cofactors and Vitamins | <b>G</b> Energy Metabolism                           | <b>K</b> Metabolism of Other Amino Acid            |                                                                                                                                                         |
| <b>D</b> Lipid Metabolism                     | <b>H</b> Biosynthesis of Other Secondary Metabolites |                                                    |                                                                                                                                                         |

**Supplementary Figure 17. *In silico* analysis of metabolic pathways according to the presence of KEGG orthologous groups compared between *Blautia* (KEGG organism code: rob) and *Bacteroides* (KEGG organism code: bvu) by using iPATH3.0.**

# Supplementary Figure 18

## Comparison of *Blautia* and *Prevotella*

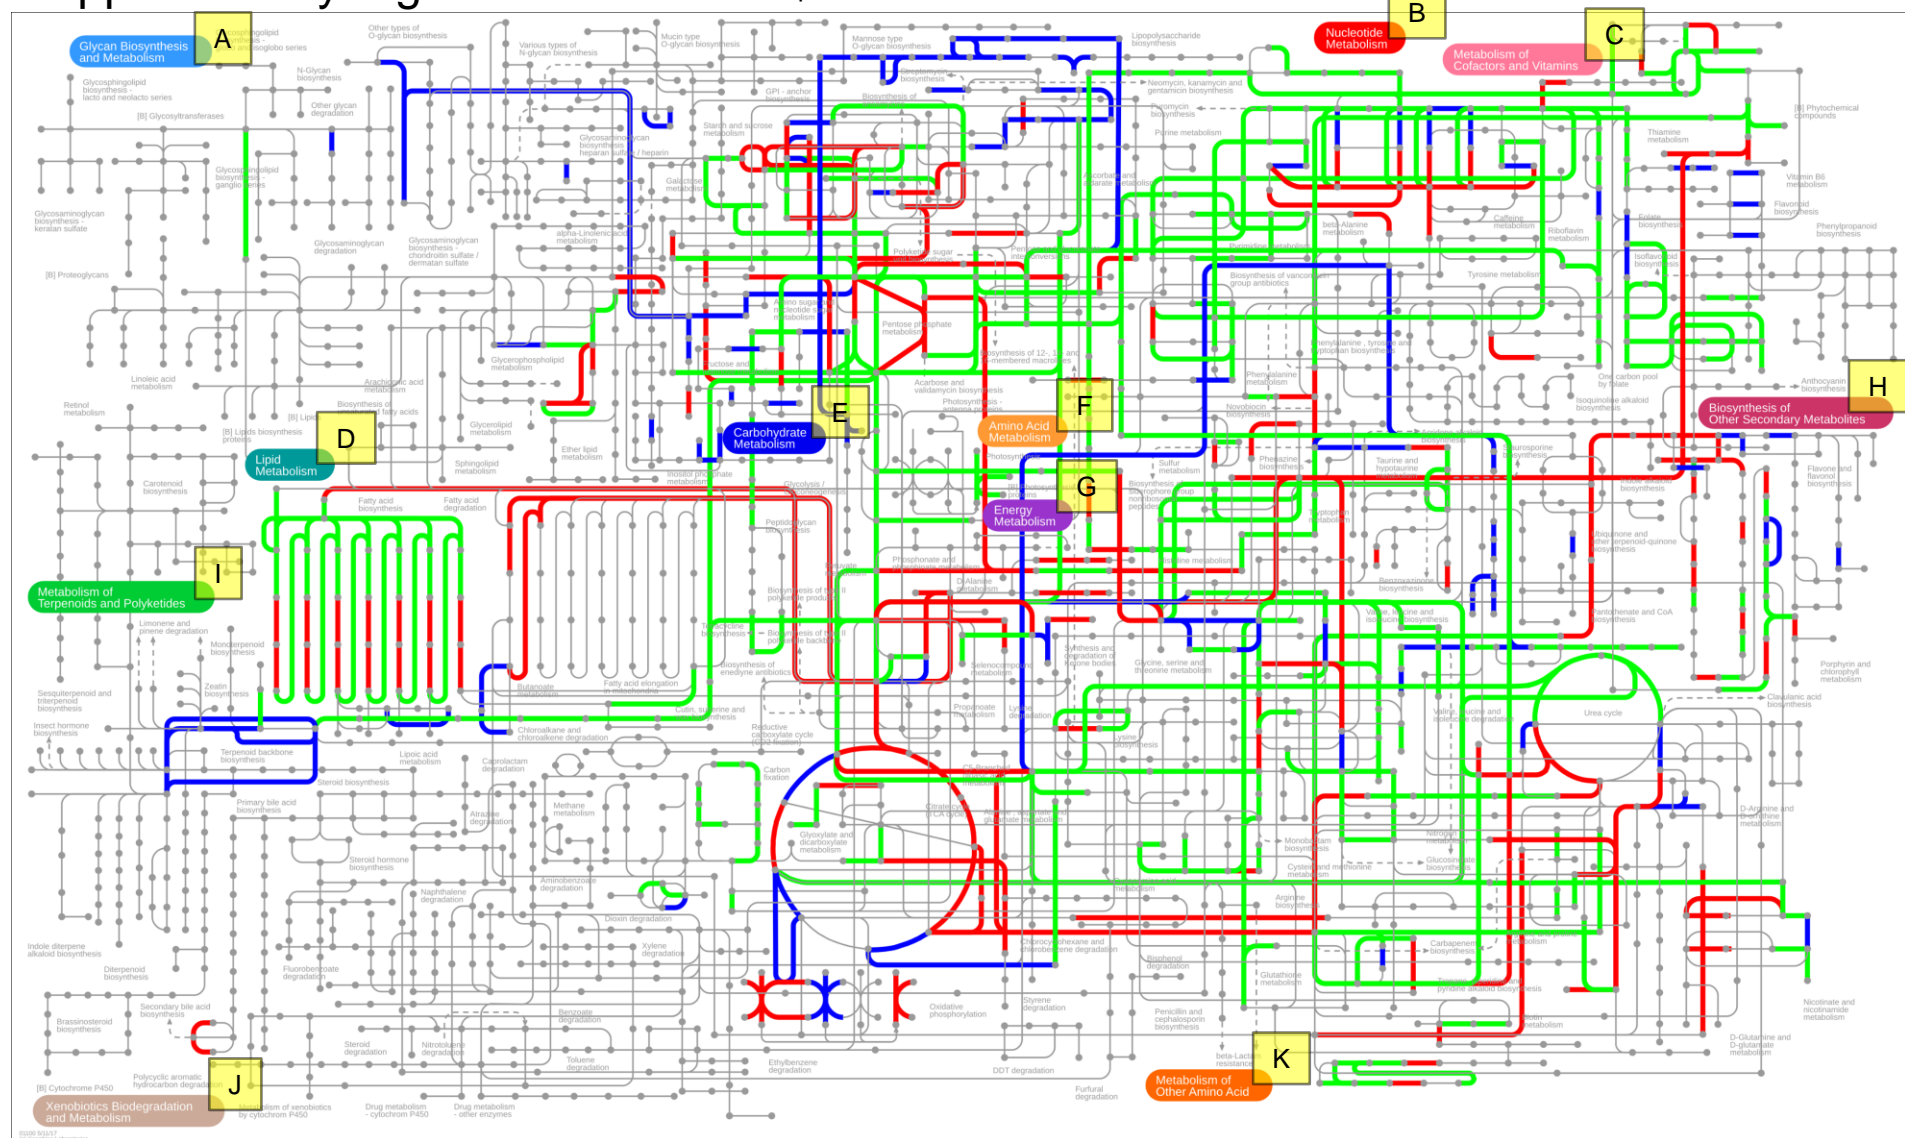

**A** Glycan Biosynthesis and Metabolism

**B** Nucleotide Metabolism

**C** Metabolism of Cofactors and Vitamins

**D** Lipid Metabolism

**E** Carbohydrate Metabolism

**F** Amino Acid Metabolism

**G** Energy Metabolism

**H** Biosynthesis of Other Secondary Metabolites

**I** Metabolism of Terpenoids and Polyketides

**J** Xenobiotics Biodegradation and Metabolism

**K** Metabolism of Other Amino Acid

— *Blautia* — *Prevotella* — In common

**Supplementary Figure 18.** *In silico* analysis of metabolic pathways according to the presence of KEGG orthologous groups compared between *Blautia* (KEGG organism code: rob) and *Prevotella* (KEGG organism code: pru) by using iPATH3.0.

# Supplementary Figure 19

## Comparison of *Blautia* and *Faecalibacterium*

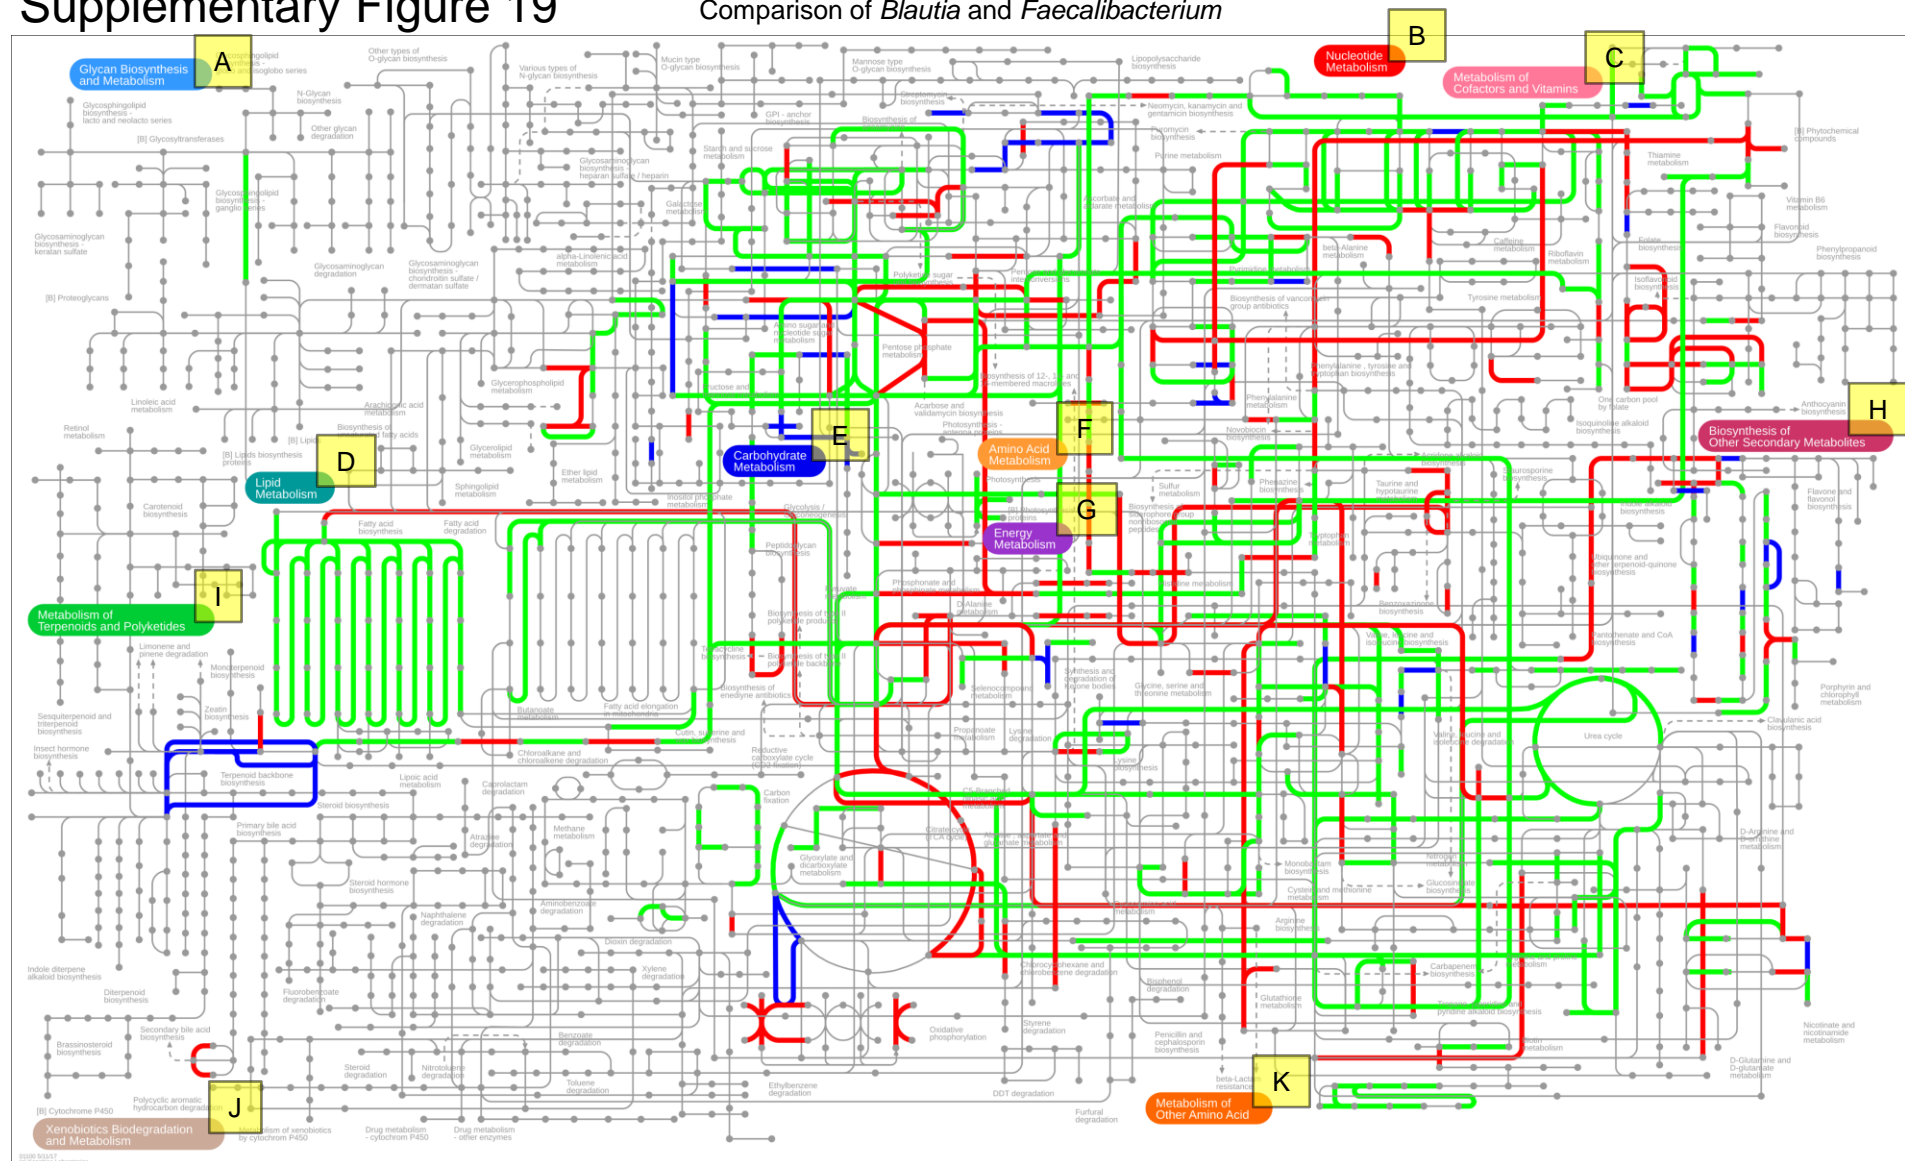

**A** Glycan Biosynthesis and Metabolism      **E** Carbohydrate Metabolism      **I** Metabolism of Terpenoids and Polyketides

**B** Nucleotide Metabolism      **F** Amino Acid Metabolism      **J** Xenobiotics Biodegradation and Metabolism

**C** Metabolism of Cofactors and Vitamins      **G** Energy Metabolism      **K** Metabolism of Other Amino Acid

**D** Lipid Metabolism      **H** Biosynthesis of Other Secondary Metabolites

**Supplementary Figure 19. In silico analysis of metabolic pathways according to the presence of KEGG orthologous groups compared between *Blautia* (KEGG organism code: rob) and *Faecalibacterium* (KEGG organism code: fpr) by using iPATH3.0.**

# Supplementary Figure 20

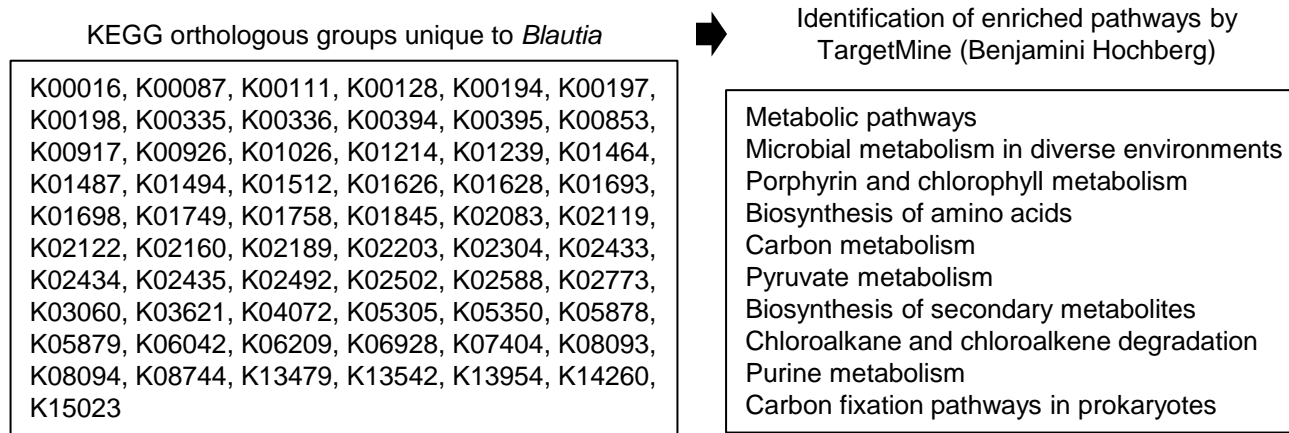

## Supplementary Figure 20. Pathways uniquely enriched in *Blautia*.

61 KEGG orthologous groups were uniquely identified in *Blautia* but not in *Bacteroides*, *Prevotella*, or *Faecalibacterium* by using iPATH3.0. TargetMine showed 10 metabolic pathways enriched in the 61 KEGG orthologous groups ( $P < 0.01$ , Benjamini–Hochberg analysis).



# Supplementary Figure 21

Unique metabolic pathways of *Blautia*

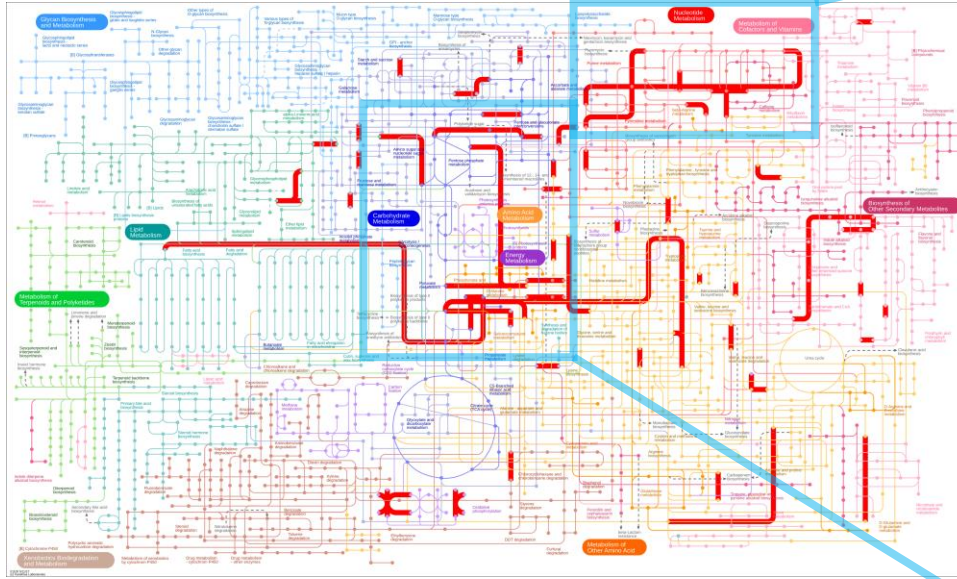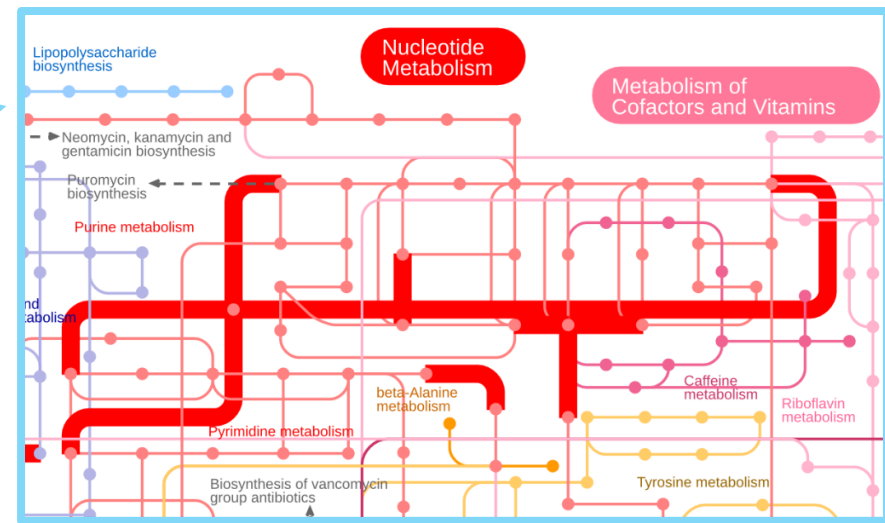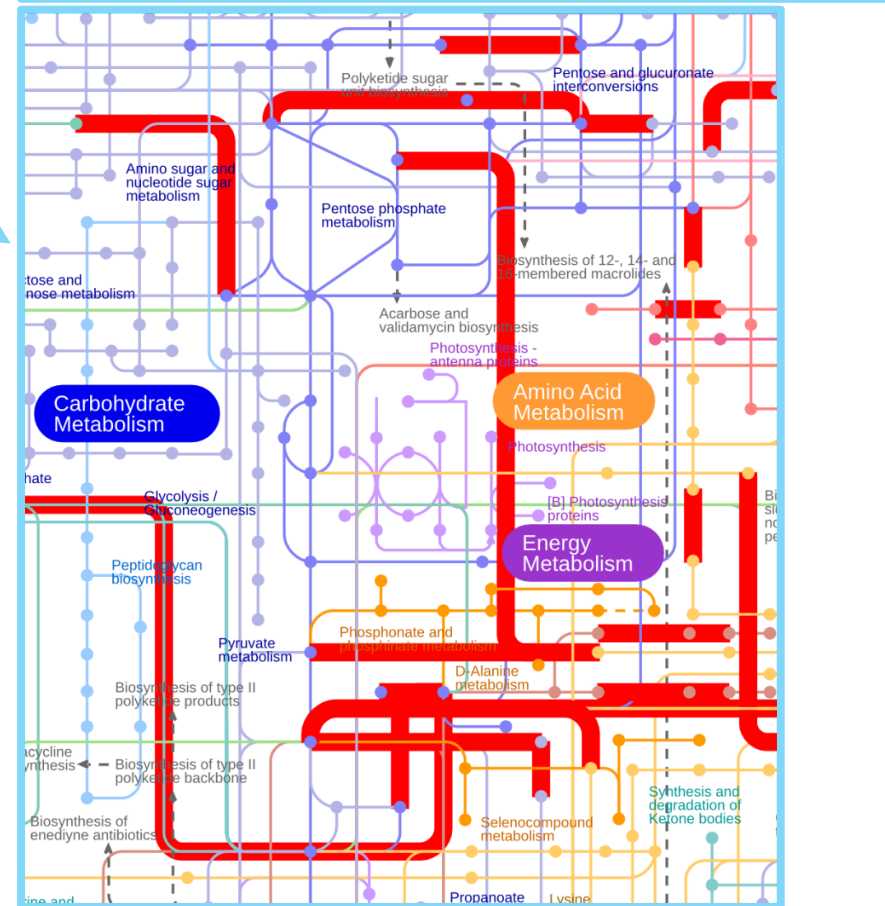

Supplementary Figure 21. Unique metabolic pathways (red lines) of *Blautia*.

# Supplementary Figure 22

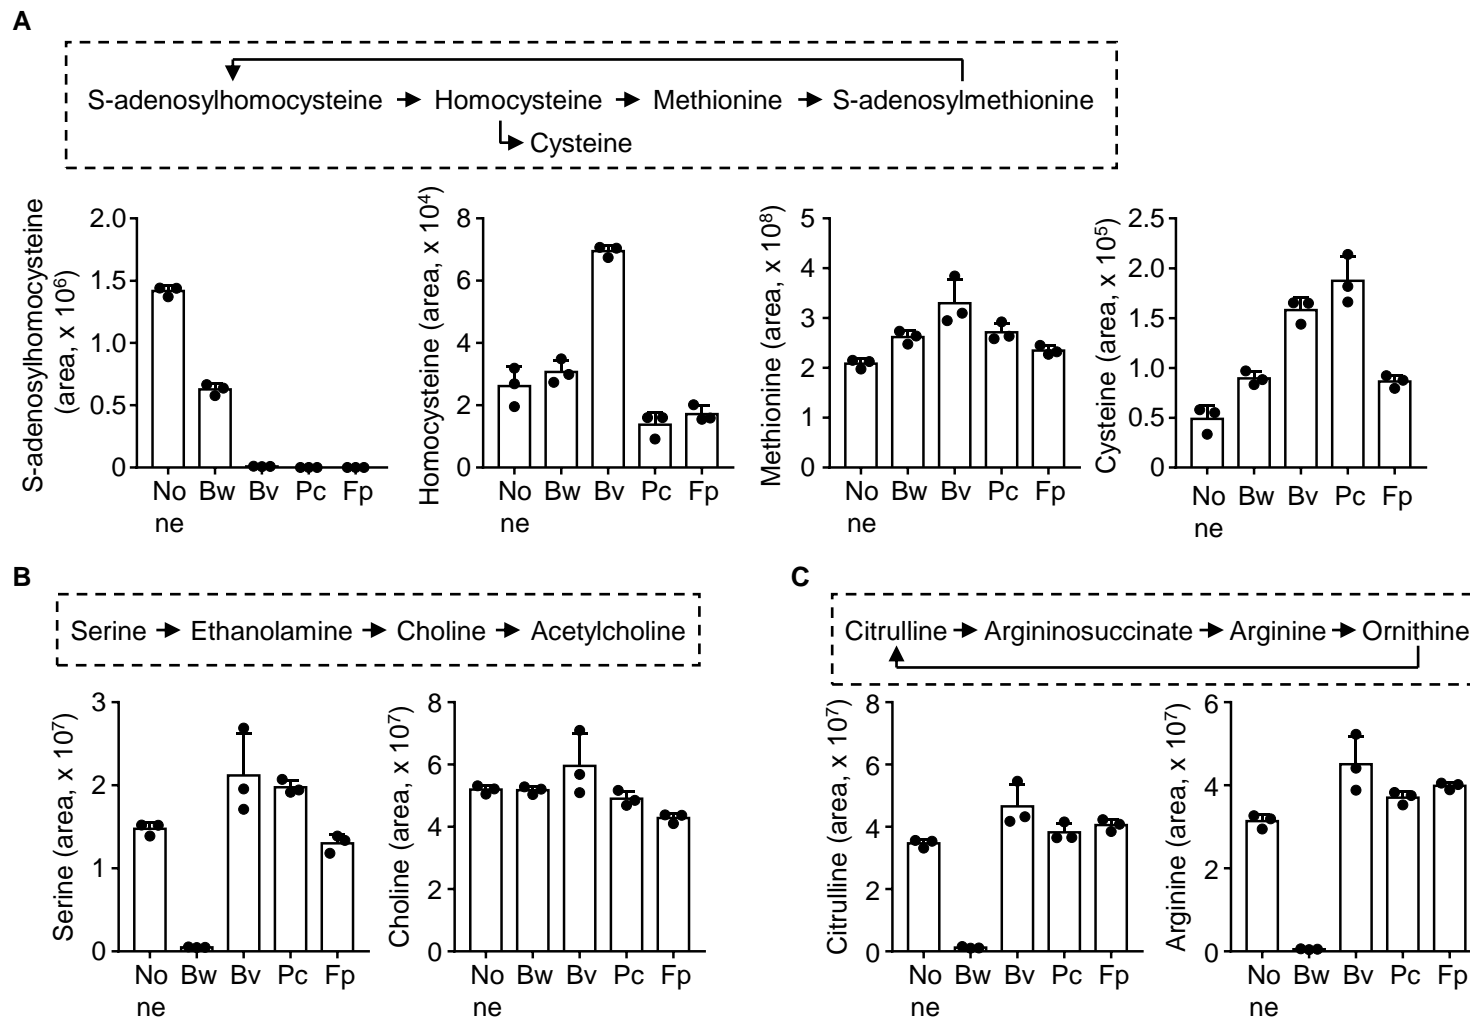

## Supplementary Figure 22. Relative abundance of bacterial metabolites in amino acid metabolism

Schematic diagrams of synthetic pathways for (A) S-adenosylmethionine, (B) acetylcholine, and (C) L-ornithine and related metabolites measured by LC-MS/MS in fresh medium (none) and the supernatant from cultures of *B. wexlerae* (Bw) and major intestinal bacteria-cultured supernatant including *Bacteroides vulgatus* (Bv), *Prevotella copri* (Pc), and *Faecalibacterium prausnitzii* (Fp). Data are representative of 2 independent experiments (n = 3, mean ± 1 SD).

## Supplementary Figure 23

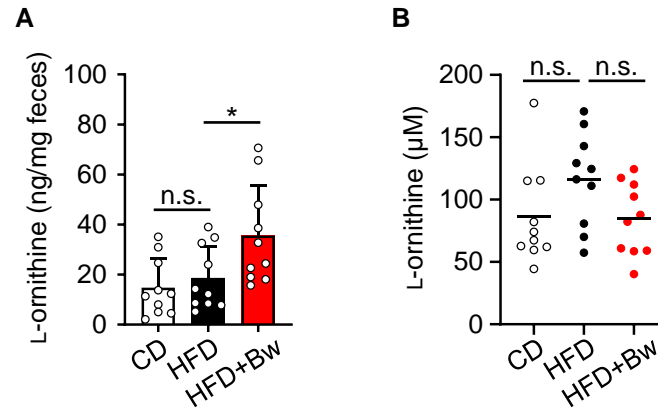

### Supplementary Figure 23. Quantitative measurement by LC-MS/MS of L-ornithine in mice

(A) Mouse fecal sample was collected from mice at 8 weeks, stored at  $-80^{\circ}\text{C}$ , and analyzed by LC-MS/MS. (B) Mouse serum was collected at 10 weeks when they were euthanized for tissue sampling, stored at  $-80^{\circ}\text{C}$ , and analyzed by LC-MS/MS. Statistical significance was evaluated by using one-way ANOVA;  $*P = 0.0497$ ; n.s., not significant. CD, CD-fed mice; HFD, HFD-fed mice; HFD+Bw, HFD-fed mice orally supplemented with *B. wexlerae*. Data are combined from 2 independent experiments ( $n = 10$ , mean  $\pm$  1 SD).



# Supplementary Figure 24

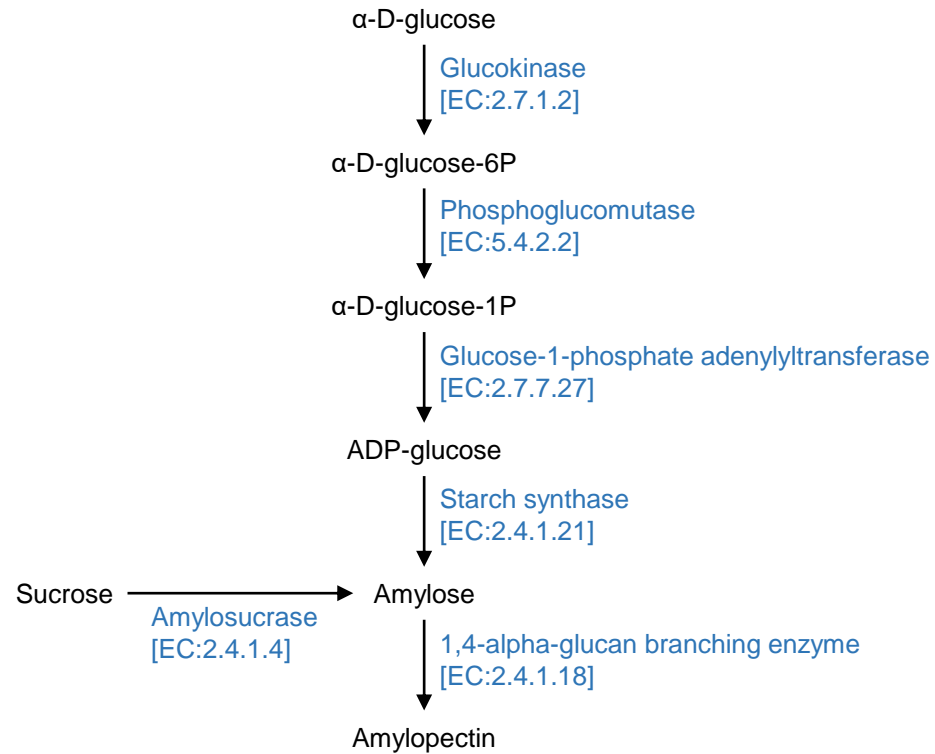

Supplementary Figure 24. KEGG pathway map for starch metabolism in *B. wexlerae*

# Supplementary Figure 25

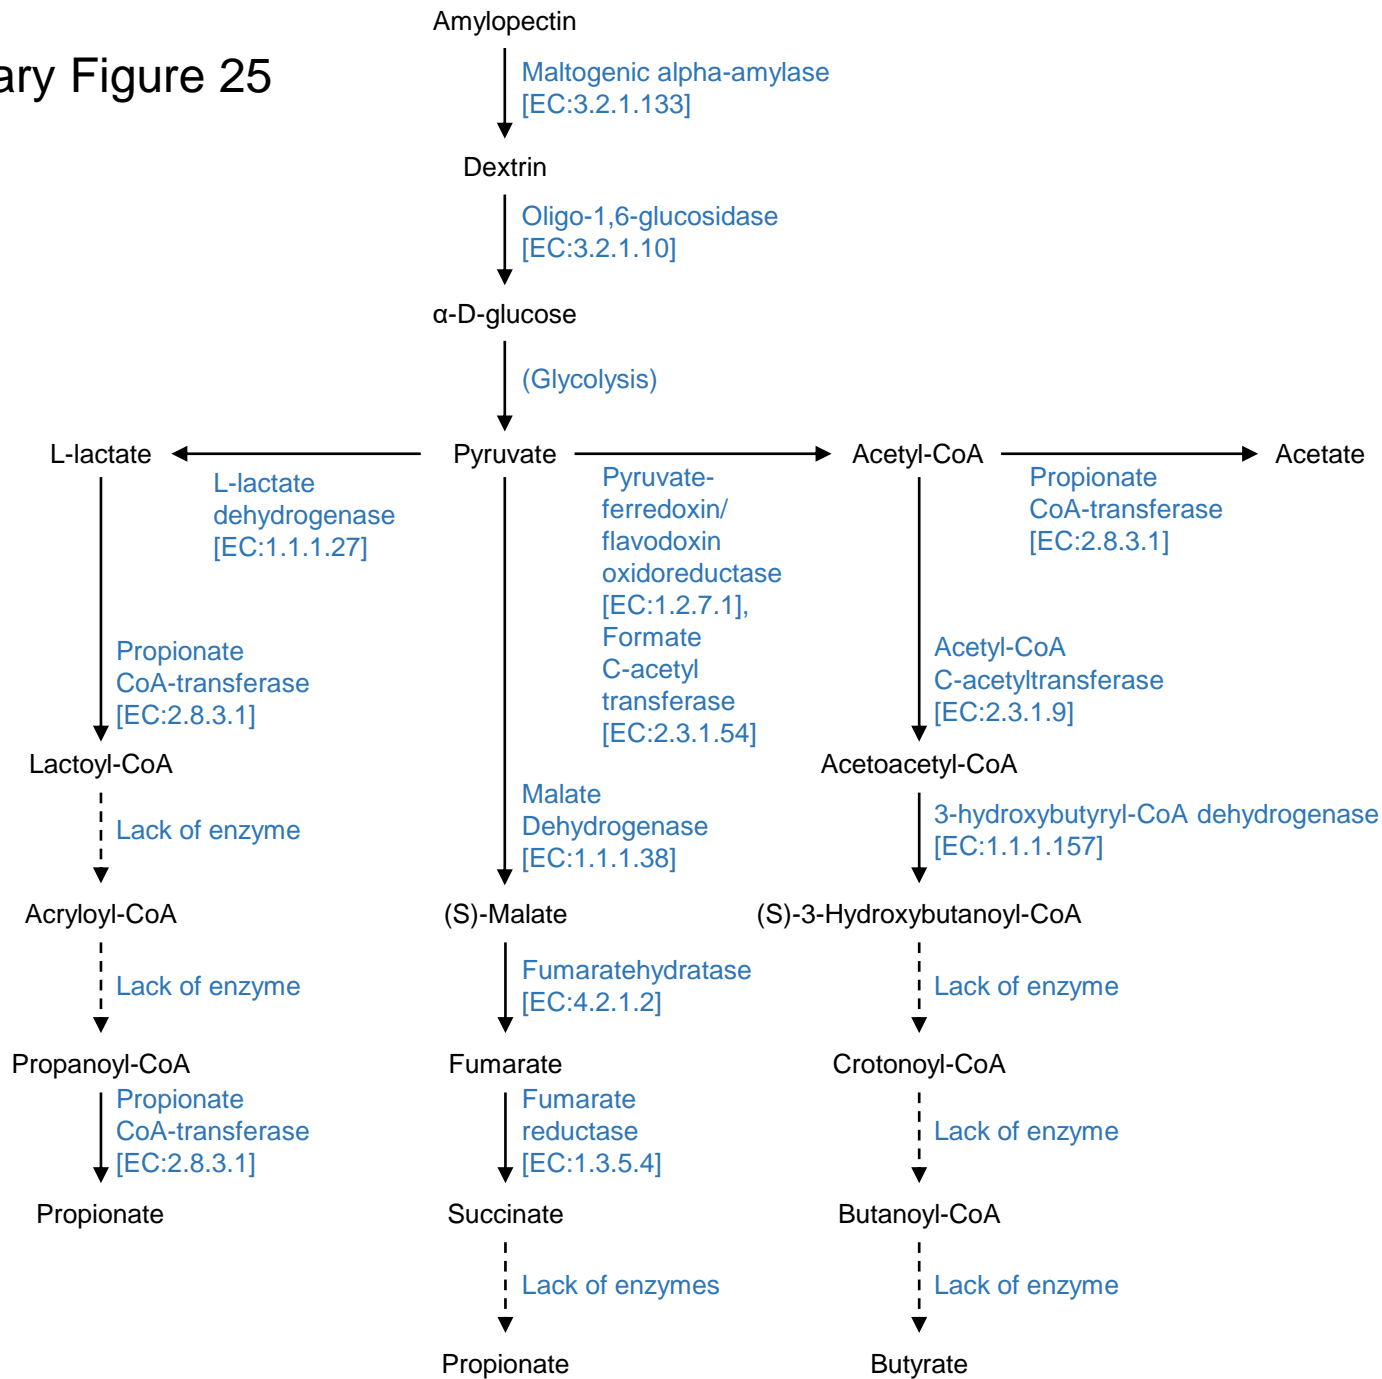

Supplementary Figure 25. KEGG pathway map for carbohydrate metabolism in *B. wexlerae*

## Supplementary Figure 26

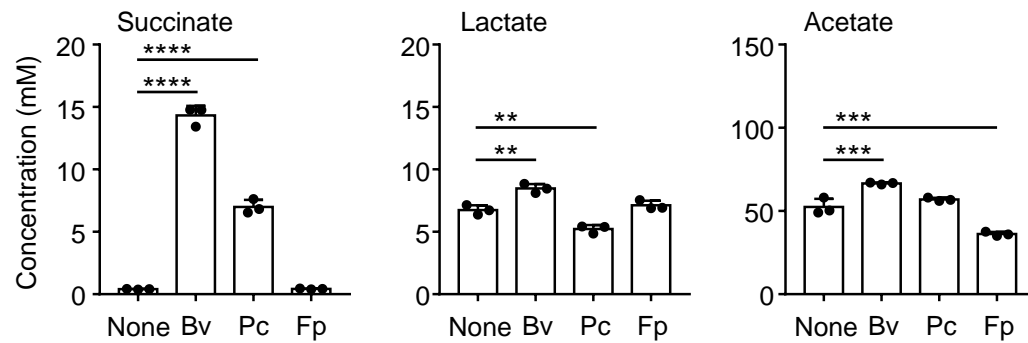

**Supplementary Figure 26. The concentrations of succinate, lactate, and acetate in the supernatants from cultures of *Bacteroides vulgatus* (Bv), *Prevotella copri* (Pc), and *Faecalibacterium prausnitzii* (Fp) and in fresh medium (none).** Data are representative of 2 independent experiments (n = 3, mean  $\pm$  1 SD). Statistical significance was evaluated by using one-way ANOVA; \*\*\*\* $P$  < 0.0001; \*\*\* $P$  < 0.001; \*\* $P$  < 0.01;.



Supplementary Table 1. Participant information in discovery cohort

|                                                        | Total subjects <sup>a</sup>          | Non-diabetic subjects<br>(nonDM)               | Type 2 diabetes patients<br>(T2DM)                |
|--------------------------------------------------------|--------------------------------------|------------------------------------------------|---------------------------------------------------|
| Number                                                 | 217                                  | 147                                            | 45                                                |
| Male/Female                                            | 110/107                              | 73/74                                          | 23/22                                             |
| Age<br>(years, mean $\pm$ SD)                          | 51.9 $\pm$ 13.0<br>(Range: 30-79)    | 48.7 $\pm$ 11.6<br>(Range: 30-76)              | 62.0 $\pm$ 12.4 <sup>b</sup><br>(Range: 34-79)    |
| Body mass index<br>(kg/m <sup>2</sup> , mean $\pm$ SD) | 23.0 $\pm$ 4.1<br>(Range: 16.2–39.6) | 22.0 $\pm$ 2.7<br>(Range: 17.0–30.6)           | 26.4 $\pm$ 5.9 <sup>b</sup><br>(Range: 16.2–39.6) |
| Comorbidity                                            |                                      |                                                |                                                   |
| Hypertension                                           | 48 (22%)                             | 19 (13%)                                       | 22 (49%)                                          |
| Dyslipidemia                                           | 58 (27%)                             | 27 (18%)                                       | 21 (47%)                                          |
| Laboratory data                                        |                                      |                                                |                                                   |
| Glucose<br>(mg/dL, mean $\pm$ SD)                      |                                      | 91.5 $\pm$ 8.9 <sup>c</sup><br>(Range: 77-117) | 140.5 $\pm$ 52.2 <sup>d</sup><br>(Range: 70-323)  |
| HbA1c<br>(%, mean $\pm$ SD)                            |                                      | Not tested                                     | 7.0 $\pm$ 1.2<br>(Range: 5.6-11.3)                |
| Medication                                             |                                      |                                                |                                                   |
| Sulfonylureas                                          |                                      |                                                | 10 (22%)                                          |
| Fast acting insulin secretagogue                       |                                      |                                                | 4 (9%)                                            |
| Biguanide                                              |                                      |                                                | 26 (58%)                                          |
| $\alpha$ -glucosidase inhibitor                        |                                      |                                                | 4 (9%)                                            |
| SGLT2 inhibitor                                        |                                      |                                                | 10 (22%)                                          |
| Incretin-related drugs (DPP-4 inhibitor)               |                                      |                                                | 23 (51%)                                          |
| Insulin preparation                                    |                                      |                                                | 16 (36%)                                          |
| GLP-1 receptor agonist                                 |                                      |                                                | 3 (7%)                                            |

<sup>a</sup> Both T1DM (n=25) and T2DM (n=45) are included in this study because of the recruitment of diabetic patients at the hospital. The analysis of the relationship between BMI (obesity) and intestinal bacteria (Fig. 1A, Supplementary Table 3) was performed by using the data of the 217 total subjects. Because T1DM and T2DM differ in pathogenesis, we chose to focus on T2DM from the viewpoint of diabetes, exclude T1DM, and analyze the relationship between T2DM and intestinal bacteria (Fig. 1B, Supplementary Table 4).

<sup>b</sup>  $P < 0.01$  (two-tailed Mann–Whitney  $U$ -test) between nonDM subjects and T2DM patients

<sup>c</sup> Fasting blood glucose measured at medical examination.

<sup>d</sup> Casual blood glucose measured at hospital.

Supplementary Table 2. Participant information for normal/overweight/obese subgroups of nonDM subjects and T2DM patients in discovery cohort

|                                                    | Non-diabetic subjects<br>(nonDM) |                                  |                                  | Type 2 diabetes patients<br>(T2DM) |                                  |                                  |
|----------------------------------------------------|----------------------------------|----------------------------------|----------------------------------|------------------------------------|----------------------------------|----------------------------------|
|                                                    | Normal<br>(BMI 18.5–24.9)        | Overweight<br>(BMI 25.0–29.9)    | Obese<br>(BMI ≥ 30)              | Normal<br>(BMI 18.5–24.9)          | Overweight<br>(BMI 25.0–29.9)    | Obese<br>(BMI ≥ 30)              |
| Number                                             | 112                              | 20                               | 2                                | 22                                 | 8                                | 14                               |
| Male/Female                                        | 55/57                            | 16/4                             | 2/0                              | 11/11                              | 4/4                              | 8/6                              |
| Age<br>(years, mean ± SD)                          | 49.8 ± 12.3<br>(Range: 30-76)    | 47.8 ± 8.2<br>(Range: 31-68)     | 43.0 ± 4.2<br>(Range: 40-46)     | 65.8 ± 10.1<br>(Range: 45-78)      | 65.9 ± 11.8<br>(Range: 44-79)    | 53.8 ± 13.1<br>(Range: 34-74)    |
| Body mass index<br>(kg/m <sup>2</sup> , mean ± SD) | 21.6 ± 1.7<br>(Range: 18.6–24.9) | 26.2 ± 1.2<br>(Range: 25.0–28.7) | 30.5 ± 0.1<br>(Range: 30.4–30.6) | 22.0 ± 1.7<br>(Range: 18.9–24.9)   | 26.3 ± 1.0<br>(Range: 25.1–27.6) | 34.0 ± 2.9<br>(Range: 30.0–39.6) |

Supplementary Table 3. Multiple regression analysis for BMI-related bacteria among 217 total subjects

| Genus                              | Estimate $\pm$ SD  | T value | P value | Mean $\pm$ SD (%) |                 |
|------------------------------------|--------------------|---------|---------|-------------------|-----------------|
|                                    |                    |         |         | Normal (n=148)    | Obesity (n=52)  |
| <i>Dorea</i>                       | 0.038 $\pm$ 0.010  | 3.703   | 0.0003  | 0.19 $\pm$ 0.23   | 0.29 $\pm$ 0.28 |
| <i>Ruminococcaceae.UGC.014</i>     | 0.014 $\pm$ 0.008  | 1.715   | 0.0878  | 0.12 $\pm$ 0.05   | 0.12 $\pm$ 0.04 |
| <i>Clostridium.sensu.stricto.1</i> | 0.009 $\pm$ 0.005  | 1.679   | 0.0946  | 0.11 $\pm$ 0.05   | 0.10 $\pm$ 0.05 |
| <i>Lachnospiraceae_uncultured</i>  | 0.008 $\pm$ 0.004  | 2.080   | 0.0388  | 0.51 $\pm$ 0.60   | 0.58 $\pm$ 0.72 |
| <i>Dialister</i>                   | 0.007 $\pm$ 0.005  | 1.318   | 0.1890  | 0.18 $\pm$ 0.42   | 0.30 $\pm$ 0.68 |
| <i>Streptococcus</i>               | 0.005 $\pm$ 0.002  | 2.981   | 0.0032  | 0.55 $\pm$ 1.46   | 0.75 $\pm$ 1.36 |
| <i>Barnesiella</i>                 | 0.005 $\pm$ 0.003  | 1.530   | 0.1277  | 0.37 $\pm$ 0.64   | 0.52 $\pm$ 0.96 |
| <i>Megasphaera</i>                 | 0.002 $\pm$ 0.001  | 1.833   | 0.0683  | 0.60 $\pm$ 1.73   | 1.95 $\pm$ 3.83 |
| <i>Megamonas</i>                   | 0.002 $\pm$ 0.001  | 2.647   | 0.0088  | 0.63 $\pm$ 3.07   | 2.18 $\pm$ 5.01 |
| <i>Parabacteroides</i>             | 0.001 $\pm$ 0.001  | 1.769   | 0.0784  | 3.63 $\pm$ 5.18   | 3.45 $\pm$ 3.51 |
| <i>Faecalibacterium</i>            | -0.001 $\pm$ 0.001 | -0.966  | 0.3352  | 6.41 $\pm$ 5.03   | 4.73 $\pm$ 4.73 |
| <i>Blautia</i>                     | -0.001 $\pm$ 0.001 | -1.535  | 0.1263  | 4.99 $\pm$ 4.41   | 3.31 $\pm$ 2.42 |
| <i>Bifidobacterium</i>             | -0.001 $\pm$ 0.001 | -3.279  | 0.0012  | 5.35 $\pm$ 6.51   | 2.55 $\pm$ 3.28 |
| <i>Lachnospira</i>                 | -0.005 $\pm$ 0.003 | -1.927  | 0.0554  | 0.70 $\pm$ 0.91   | 0.69 $\pm$ 1.10 |
| <i>Butyricicoccus</i>              | -0.011 $\pm$ 0.006 | -1.804  | 0.0727  | 0.64 $\pm$ 0.48   | 0.49 $\pm$ 0.41 |
| <i>Ruminococcaceae.UGC.005</i>     | -0.016 $\pm$ 0.006 | -2.809  | 0.0055  | 0.23 $\pm$ 0.75   | 0.09 $\pm$ 0.33 |

The multiple regression analysis of the relationship between BMI and intestinal bacteria was performed by using the data of the 217 total subjects (Supplementary Table 1).

Supplementary Table 4. Multiple logistic analysis for T2DM-related bacteria among 147 nonDM subjects and 45 T2DM patients

| Genus                                  | Estimate $\pm$ SD  | Z value | P value | Mean $\pm$ SD (%) |                  |
|----------------------------------------|--------------------|---------|---------|-------------------|------------------|
|                                        |                    |         |         | nonDM (n=147)     | T2DM (n=45)      |
| <i>Flavonifractor</i>                  | -0.045 $\pm$ 0.016 | -2.735  | 0.0062  | 0.14 $\pm$ 0.16   | 0.20 $\pm$ 0.20  |
| <i>Dorea</i>                           | -0.041 $\pm$ 0.015 | -2.769  | 0.0056  | 0.20 $\pm$ 0.22   | 0.23 $\pm$ 0.30  |
| <i>Christensenellaceae.R.7.group</i>   | -0.018 $\pm$ 0.006 | -3.297  | 0.0010  | 0.33 $\pm$ 1.20   | 0.40 $\pm$ 1.27  |
| <i>Ruminococcus.1</i>                  | -0.011 $\pm$ 0.003 | -3.168  | 0.0015  | 0.60 $\pm$ 1.14   | 0.75 $\pm$ 1.56  |
| <i>Lachnospiraceae_uncultured</i>      | -0.010 $\pm$ 0.004 | -2.317  | 0.0205  | 0.51 $\pm$ 0.56   | 0.61 $\pm$ 0.80  |
| <i>Ruminococcus.2</i>                  | -0.010 $\pm$ 0.003 | -3.360  | 0.0008  | 0.25 $\pm$ 0.76   | 0.72 $\pm$ 1.20  |
| <i>Streptococcus</i>                   | -0.005 $\pm$ 0.002 | -2.429  | 0.0151  | 0.52 $\pm$ 1.41   | 0.67 $\pm$ 1.42  |
| <i>Prevotella.2</i>                    | -0.003 $\pm$ 0.001 | -2.925  | 0.0034  | 0.55 $\pm$ 3.03   | 0.97 $\pm$ 4.88  |
| <i>Megasphaera</i>                     | -0.002 $\pm$ 0.001 | -1.899  | 0.0575  | 0.60 $\pm$ 1.56   | 1.62 $\pm$ 3.81  |
| <i>Fusobacterium</i>                   | -0.002 $\pm$ 0.001 | -1.759  | 0.0786  | 0.68 $\pm$ 2.96   | 0.96 $\pm$ 3.00  |
| <i>Faecalibacterium</i>                | 0.002 $\pm$ 0.001  | 2.310   | 0.0209  | 6.87 $\pm$ 5.08   | 4.15 $\pm$ 4.53  |
| <i>Blautia</i>                         | 0.003 $\pm$ 0.001  | 2.354   | 0.0186  | 5.30 $\pm$ 4.35   | 2.65 $\pm$ 2.06  |
| <i>Subdoligranulum</i>                 | 0.004 $\pm$ 0.001  | 2.356   | 0.0185  | 1.81 $\pm$ 2.05   | 1.34 $\pm$ 2.18  |
| <i>Sutterella</i>                      | 0.006 $\pm$ 0.002  | 2.630   | 0.0085  | 1.64 $\pm$ 1.95   | 1.24 $\pm$ 1.62  |
| <i>Collinsella</i>                     | 0.006 $\pm$ 0.002  | 2.639   | 0.0083  | 1.00 $\pm$ 1.44   | 0.71 $\pm$ 0.97  |
| <i>Anaerostipes</i>                    | 0.009 $\pm$ 0.004  | 2.337   | 0.0195  | 1.36 $\pm$ 2.12   | 0.62 $\pm$ 0.65  |
| <i>Butyricoccus</i>                    | 0.011 $\pm$ 0.007  | 1.656   | 0.0977  | 0.68 $\pm$ 0.45   | 0.48 $\pm$ 0.45  |
| <i>Alloprevotella</i>                  | 0.012 $\pm$ 0.009  | 1.307   | 0.1913  | 0.49 $\pm$ 2.49   | 0.03 $\pm$ 0.23  |
| <i>Bilophila</i>                       | 0.014 $\pm$ 0.011  | 1.294   | 0.1957  | 0.22 $\pm$ 0.26   | 0.20 $\pm$ 0.28  |
| <i>Holdemanella</i>                    | 0.018 $\pm$ 0.009  | 2.080   | 0.0375  | 0.16 $\pm$ 0.50   | 0.13 $\pm$ 0.40  |
| <i>Prevotellaceae_uncultured</i>       | 0.087 $\pm$ 0.075  | 1.163   | 0.2447  | 0.15 $\pm$ 1.31   | 0.002 $\pm$ 0.01 |
| <i>Eubacterium..xylanophilum.group</i> | 0.381 $\pm$ 0.121  | 3.152   | 0.0016  | 0.04 $\pm$ 0.14   | 0.004 $\pm$ 0.02 |

The multiple logistic analysis of the relationship between T2DM and intestinal bacteria was performed by using the data of the 192 subjects (comprising 147 nonDM subjects and 45 T2DM patients and excluding 25 patients with Type 1 diabetes) (Supplementary Table 1).



Supplementary Table 5. Relationship between *Blautia* and BMI

| <i>Blautia</i> (%) | BMI             |                 | Odds |
|--------------------|-----------------|-----------------|------|
|                    | 18.5–24.9       | ≥25.0           |      |
| 0–2.9              | 63 <sup>a</sup> | 32 <sup>a</sup> | 0.51 |
| 3.0–5.9            | 38 <sup>a</sup> | 15 <sup>a</sup> | 0.39 |
| ≥6.0               | 47 <sup>a</sup> | 5 <sup>a</sup>  | 0.11 |

<sup>a</sup> Number of participants

Supplementary Table 6. Relationship between *Blautia* and T2DM

| <i>Blautia</i> (%) | nonDM           | T2DM            | Odds |
|--------------------|-----------------|-----------------|------|
| 0–2.9              | 55 <sup>a</sup> | 33 <sup>a</sup> | 0.60 |
| 3.0–5.9            | 42 <sup>a</sup> | 10 <sup>a</sup> | 0.23 |
| ≥6.0               | 50 <sup>a</sup> | 2 <sup>a</sup>  | 0.04 |

<sup>a</sup> Number of participants

Supplementary Table 7. The abundance of *Blautia* genus in human data set randomly adjusted in terms of age and sex.

| Data set | Phenotype | Number | Male/<br>female | Age<br>(years, mean $\pm$ SD) | <i>Blautia</i><br>(%, mean $\pm$ SD) | <i>P</i> value <sup>a</sup> |
|----------|-----------|--------|-----------------|-------------------------------|--------------------------------------|-----------------------------|
| 1        | nonDM     | 53     | 29/24           | 58.5 $\pm$ 11.2               | 5.9 $\pm$ 3.9                        | <0.0001                     |
|          | T2DM      | 35     | 19/16           | 58.8 $\pm$ 11.9               | 2.3 $\pm$ 1.7                        |                             |
| 2        | nonDM     | 53     | 29/24           | 58.4 $\pm$ 11.2               | 5.4 $\pm$ 3.8                        | <0.0001                     |
|          | T2DM      | 35     | 19/16           | 59.0 $\pm$ 12.3               | 2.5 $\pm$ 1.8                        |                             |
| 3        | nonDM     | 53     | 29/24           | 58.5 $\pm$ 11.3               | 5.1 $\pm$ 3.6                        | 0.0001                      |
|          | T2DM      | 35     | 19/16           | 58.8 $\pm$ 11.9               | 2.7 $\pm$ 2.2                        |                             |
| 4        | nonDM     | 53     | 29/24           | 58.4 $\pm$ 11.3               | 5.6 $\pm$ 4.9                        | <0.0001                     |
|          | T2DM      | 35     | 19/16           | 58.7 $\pm$ 12.0               | 2.3 $\pm$ 1.7                        |                             |

<sup>a</sup> Comparison of *Blautia* between nonDM subjects and T2DM patients using two-tailed Mann-Whitney *U*-test.

Supplementary Table 8. Participant information in validation cohort

|                                                    | Total subjects                              | Normal<br>(BMI 18.5–24.9)        | Overweight<br>(BMI 25.0–29.9)    | Obese<br>(BMI ≥ 30)              |
|----------------------------------------------------|---------------------------------------------|----------------------------------|----------------------------------|----------------------------------|
| Number                                             | 195                                         | 132                              | 42                               | 8                                |
| Male/Female                                        | 114/81                                      | 77/55                            | 30/12                            | 3/5                              |
| Age<br>(years, mean ± SD)                          | 41.9 ± 11.9<br>(Range: 21-71)               | 41.9 ± 11.5<br>(Range: 23-66)    | 43.6 ± 12.6<br>(Range: 22-71)    | 37.0 ± 13.4<br>(Range: 21-54)    |
| Body mass index<br>(kg/m <sup>2</sup> , mean ± SD) | 22.9 ± 3.5<br>(Range: 16.7–36.6)            | 21.7 ± 1.8<br>(Range: 18.6–24.9) | 26.5 ± 1.4<br>(Range: 25.0–29.8) | 32.2 ± 2.0<br>(Range: 30.7–36.6) |
| Present illness                                    |                                             |                                  |                                  |                                  |
| Type 2 diabetes                                    | 0 (0.0%)                                    |                                  |                                  |                                  |
| Hypertension                                       | 8 (4.1%)                                    |                                  |                                  |                                  |
| Dyslipidemia                                       | 21 (10.8%)                                  |                                  |                                  |                                  |
| Laboratory data                                    |                                             |                                  |                                  |                                  |
| Glucose<br>(mg/dL, mean ± SD)                      | 97.9 ± 13.7 <sup>a</sup><br>(Range: 68-228) |                                  |                                  |                                  |
| HbA1c<br>(%, mean ± SD)                            | 5.5 ± 0.4<br>(Range: 4.2-8.9)               |                                  |                                  |                                  |

<sup>a</sup> Fasting blood glucose measured at medical examination.
